# Supplementary material for: Mechanisms of a Cyclobutane-Fused Lactone Hydrolysis in Alkaline and Acidic Conditions
Source: MDPI journal article supplement (doi:10.3390/molecules26123519), 2021-06-09
Supplement: s1 [file s1]

## Supplementary Materials

### Mechanisms of a Cyclobutane-Fused Lactone Hydrolysis in Alkaline and Acidic Conditions

*Zhangxia Wang and Haibo Ma*

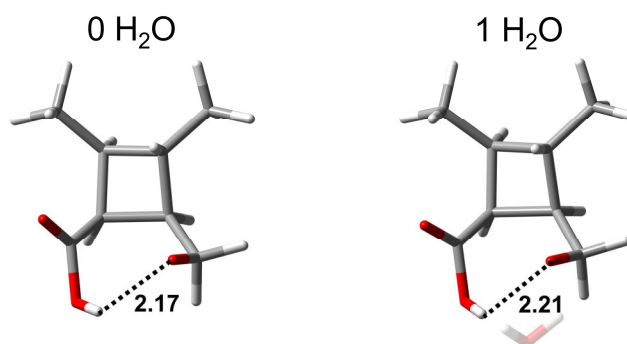

**Figure S1.** Structures of the transition state of intramolecular proton transfer along the B<sub>AC</sub>2 reaction path, without H<sub>2</sub>O or with one H<sub>2</sub>O molecule. The unit of distance is Å.

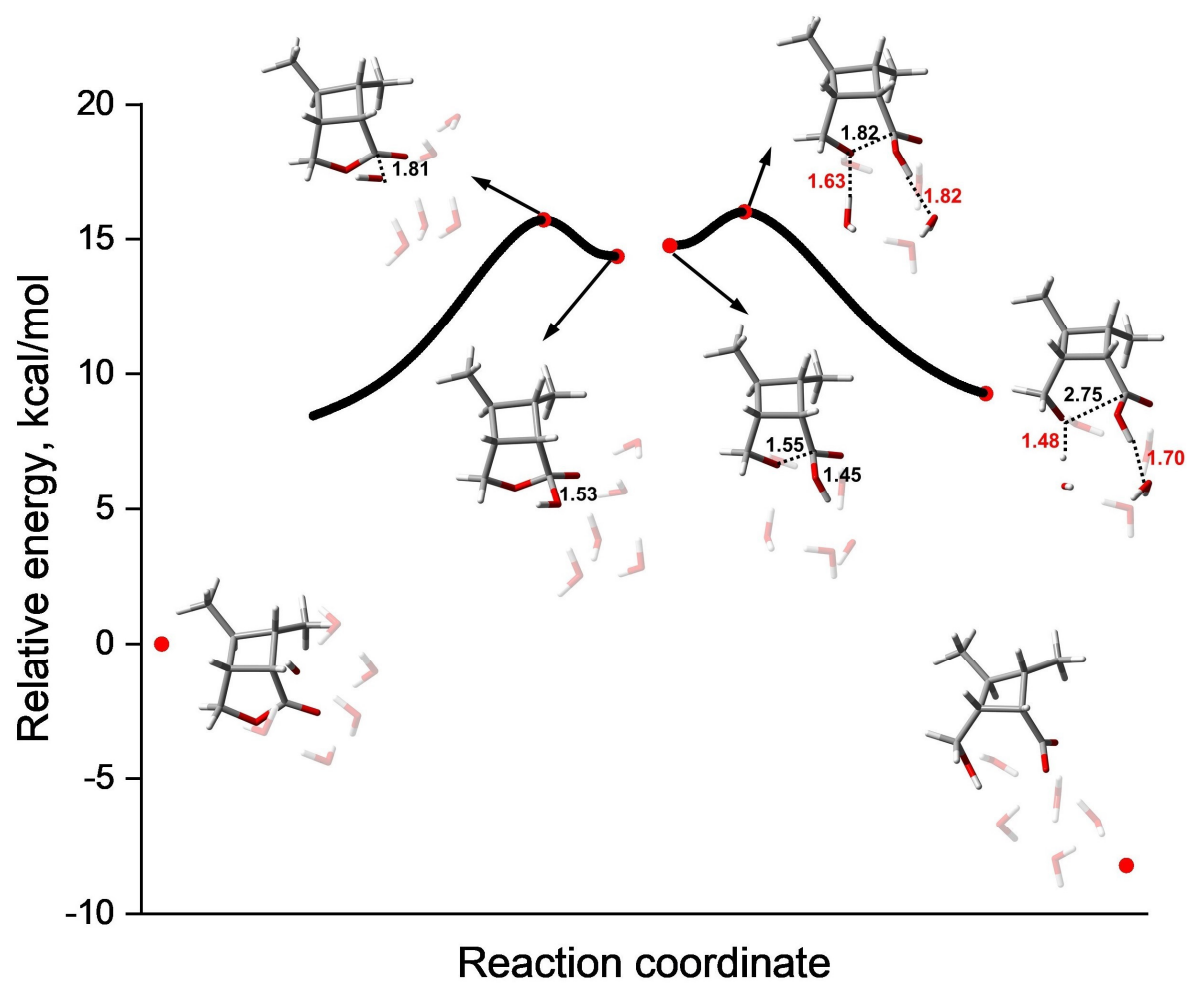

**Figure S2.** The results of intrinsic reaction path calculation of CBL along the Bac2 reaction path with 5 H<sub>2</sub>O molecules. The unit of distance is Å.

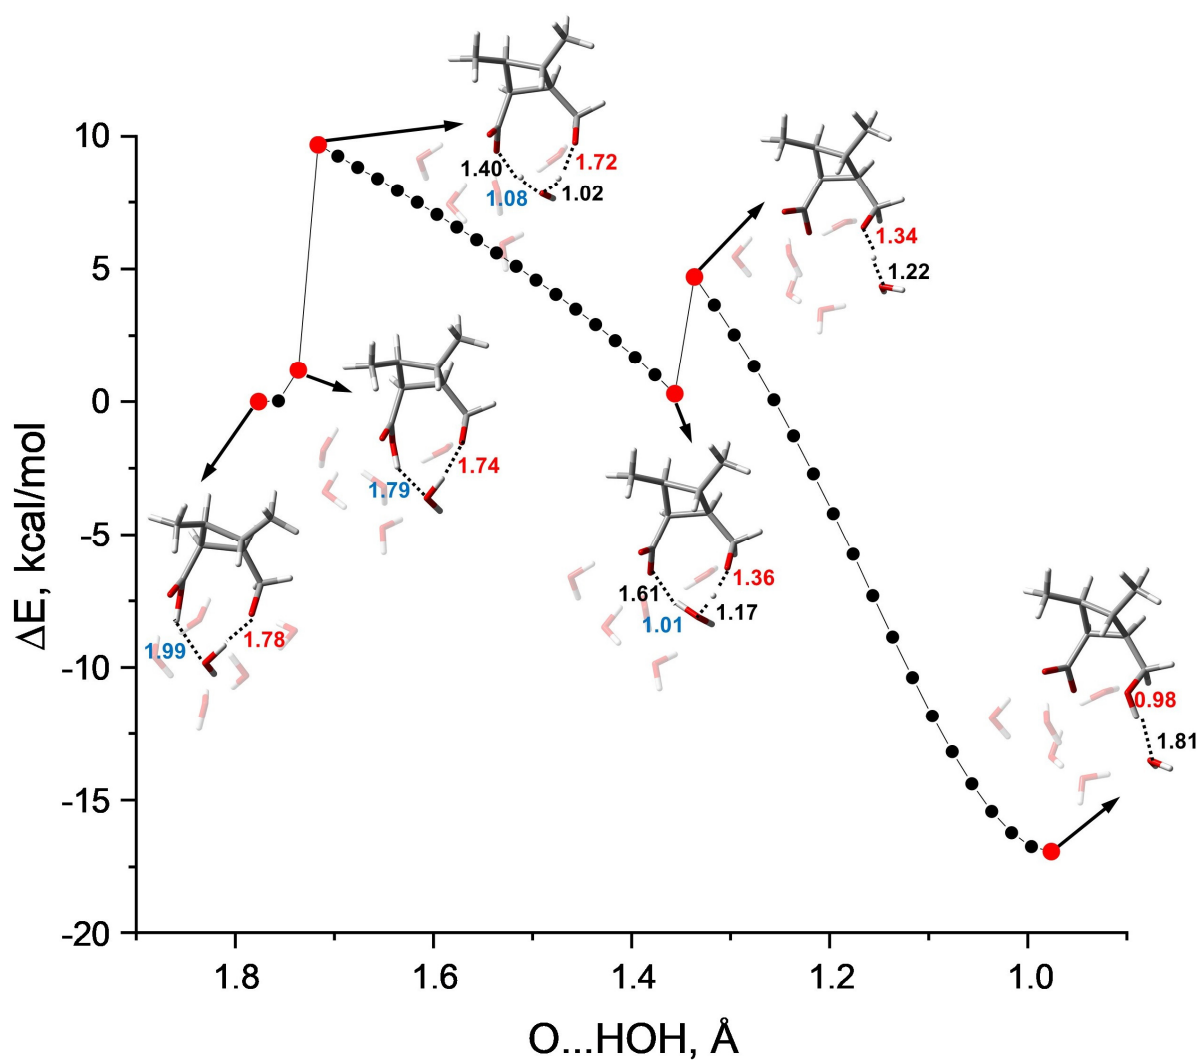

**Figure S3.** The potential energy surface scan (PES) curves of the deprotonation and protonation of CBL + 6H<sub>2</sub>O + OH<sup>-</sup>. O...HOH denotes the distance between the alkyl-oxygen and the hydrogen atom of H<sub>2</sub>O, which was set as 1.78 Å when the energy of the system was zero. The unit of distance is Å.

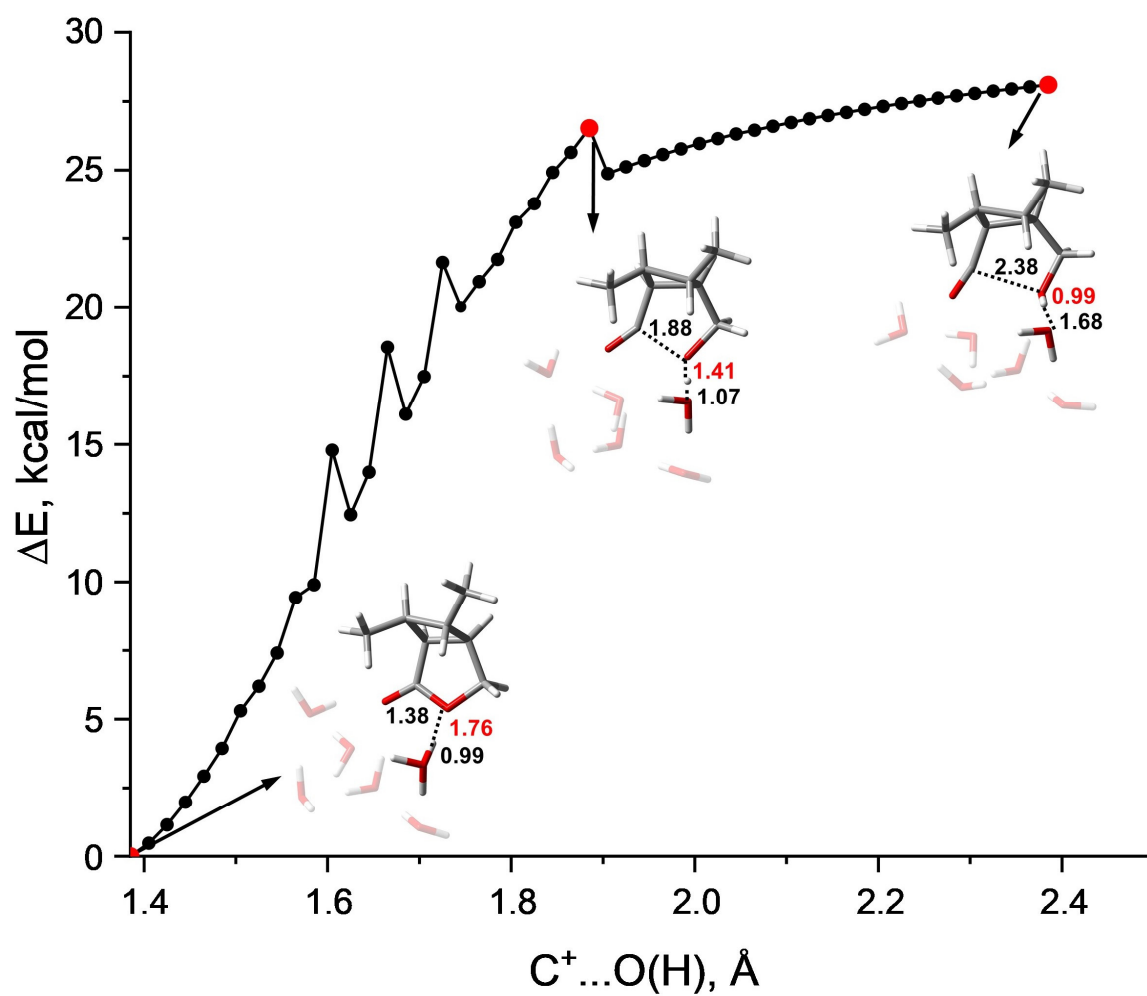

**Figure S4.** The potential energy surface scan (PES) curves of the acyl-oxygen cleavage of CBL + 5H<sub>2</sub>O + H<sub>3</sub>O<sup>+</sup>. The C<sup>+</sup>...O(H) distance was set as 1.38 Å when the energy of the system was zero. The unit of distance is Å.

**Table S1.** Free energies of TS1, Int1, and TS2 relative to R along the B<sub>AC</sub>2 reaction path of  $\gamma$ -butyrolactone. Microsolvation with 5 H<sub>2</sub>O molecules was considered in SMD. The experimental value of activation free energy ( $\Delta G_{exp}^\ddagger$ ) was 17.4–17.8 kcal/mol.<sup>1</sup> Energies are presented in kcal/mol.

| Functional | Basis set        | TS1  | Int  | TS2  | $\Delta G_{calc}^\ddagger$ |
|------------|------------------|------|------|------|----------------------------|
| B3LYP      | 6-311+G(d)       | 18.5 | 12.9 | 17.7 | 18.7                       |
|            | 6-311++G(d,p)    | 20.3 | 13.1 | 18.2 | 20.3                       |
|            | 6-311++G(2df,pd) | 20.9 | 13.6 | 19.3 | 21.0                       |
| B3LYP-D3   | 6-311+G(d)       | 13.9 | 8.7  | 11.7 | 14.0                       |
|            | 6-311++G(2df,pd) | 13.9 | 8.0  | 11.8 | 13.9                       |
| M06-2X     | 6-311+G(d)       | 10.3 | 0.1  | 5.5  | 10.3                       |
|            | 6-311++G(2df,pd) | 11.2 | 0.3  | 7.8  | 11.2                       |

**Table S2.** Free energies of TS1, Int1, and TS2 relative to R along the A<sub>Ac</sub>2 reaction path of  $\gamma$ -butyrolactone. Microsolvation with 6 H<sub>2</sub>O molecules was considered in SMD. The experimental value of activation free energy ( $\Delta G_{exp}^\ddagger$ ) was 22.5–22.9 kcal/mol.<sup>2</sup> Energies are presented in kcal/mol.

| Functional | Basis set     | TS1  | Int  | TS2  | $\Delta G_{calc}^\ddagger$ |
|------------|---------------|------|------|------|----------------------------|
| B3LYP      | 6-31++G(d,p)  | 22.6 | 17.8 | 22.9 | 23.2                       |
|            | 6-311++G(d,p) | 23.5 | 19.4 | 23.8 | 24.1                       |
| B3LYP-D3   | 6-31++G(d,p)  | 22.4 | 17.8 | 20.6 | 22.5                       |
|            | 6-311++G(d,p) | 22.6 | 18.3 | 20.5 | 22.7                       |
| M06-2X     | 6-311++G(d,p) | 19.5 | 13.3 | 17.8 | 19.5                       |

**Table S3.** Comparison of C-O distances to the nucleophile (C-O<sub>nuc</sub>) and leaving group (C-O<sub>lg</sub>) at TS1, Int, TS2, and P of the B<sub>AC</sub>2 reaction path of CBL, with 0–6 H<sub>2</sub>O molecules. All distances are given in Å.

| Distance           | TS1                | Int                |                   | TS2               | P                 |
|--------------------|--------------------|--------------------|-------------------|-------------------|-------------------|
|                    | C-O <sub>nuc</sub> | C-O <sub>nuc</sub> | C-O <sub>lg</sub> | C-O <sub>lg</sub> | C-O <sub>lg</sub> |
| 0 H <sub>2</sub> O | 1.99               | 1.49               | 1.50              | 2.07              | 3.37              |
| 1 H <sub>2</sub> O | 1.88               | 1.48               | 1.48              | 1.92              | 3.38              |
| 2 H <sub>2</sub> O | 1.79               | 1.54               | 1.47              | 1.85              | 3.04              |
| 3 H <sub>2</sub> O | 1.85               | 1.54               | 1.45              | 1.84              | 2.99              |
| 4 H <sub>2</sub> O | 1.88               | 1.45               | 1.52              | 1.88              | 3.10              |
| 5 H <sub>2</sub> O | 1.81               | 1.53               | 1.45              | 1.82              | 3.12              |
| 6 H <sub>2</sub> O | 1.81               | 1.47               | 1.51              | 1.93              | 2.96              |

**Table S4.** Comparison of dihedral angles (C-C-C-C) to the cyclobutane at R, TS1, Int, TS2, and P of the B<sub>AC</sub>2 reaction path of CBL, with 0–6 H<sub>2</sub>O molecules. All angles are given in °.

| Dihedral Angles    | R    | TS1 | Int | TS2 | P    |
|--------------------|------|-----|-----|-----|------|
| 0 H <sub>2</sub> O | 12.2 | 6.5 | 7.0 | 3.4 | 17.8 |
| 1 H <sub>2</sub> O | 12.1 | 7.6 | 6.4 | 4.9 | 17.6 |
| 2 H <sub>2</sub> O | 11.5 | 7.5 | 6.8 | 3.8 | 19.4 |
| 3 H <sub>2</sub> O | 11.8 | 5.9 | 4.6 | 1.9 | 19.3 |
| 4 H <sub>2</sub> O | 11.8 | 5.8 | 3.4 | 3.0 | 19.0 |
| 5 H <sub>2</sub> O | 12.2 | 6.6 | 6.1 | 5.6 | 20.8 |
| 6 H <sub>2</sub> O | 11.9 | 6.9 | 5.5 | 7.9 | 20.1 |



## CARTESIAN COORDINATES AND SCF ENERGIES

BAC2\_0H2O\_R Cartesian Coordinates

| Atomic Number | Coordinates (Angstroms) |           |           |
|---------------|-------------------------|-----------|-----------|
|               | X                       | Y         | Z         |
| 8             | 0.132974                | -1.663717 | 1.108474  |
| 6             | -0.236979               | -0.361237 | -0.824440 |
| 6             | 0.692647                | 0.428752  | 0.127182  |
| 1             | 0.096290                | -0.636021 | -1.825659 |
| 1             | 1.541720                | 0.926279  | -0.339480 |
| 6             | -0.492178               | 1.378585  | 0.471675  |
| 1             | -0.952492               | 1.074759  | 1.419553  |
| 6             | -0.225056               | 2.871916  | 0.473223  |
| 1             | 0.250863                | 3.183796  | -0.462173 |
| 1             | -1.155622               | 3.438647  | 0.582328  |
| 1             | 0.437700                | 3.156061  | 1.297266  |
| 6             | 1.114697                | -0.573446 | 1.189538  |
| 1             | 1.074904                | -0.188902 | 2.208295  |
| 1             | 2.093085                | -1.014174 | 0.995067  |
| 6             | -0.571550               | -1.605564 | -0.045289 |
| 8             | -1.360883               | -2.484278 | -0.334881 |
| 6             | -2.765638               | 0.453513  | -0.512440 |
| 1             | -3.343371               | 1.373361  | -0.376369 |
| 1             | -3.185426               | -0.080976 | -1.370165 |
| 1             | -2.915602               | -0.166154 | 0.376694  |
| 6             | -1.299565               | 0.785436  | -0.720938 |
| 1             | -1.180347               | 1.423850  | -1.601334 |
| 8             | 4.319659                | 0.078092  | -0.923388 |
| 1             | 5.206031                | -0.199038 | -0.656735 |

E(RB3LYP-D3) = -538.6332496 (Hartree)

Sum of electronic and thermal free energies = -538.477257 (Hartree)

## BAC2\_0H2O\_TS1 Cartesian Coordinates

| Atomic Number | Coordinates (Angstroms) |           |           |
|---------------|-------------------------|-----------|-----------|
|               | X                       | Y         | Z         |
| 8             | 1.260815                | -0.465422 | -1.167041 |
| 6             | 0.151164                | 0.153663  | 0.835720  |
| 6             | -0.478779               | -1.154895 | 0.285962  |
| 1             | 0.446996                | 0.198142  | 1.880416  |
| 1             | -0.712848               | -1.933201 | 1.013801  |
| 6             | -1.711777               | -0.350661 | -0.219035 |
| 1             | -1.680167               | -0.236958 | -1.309248 |
| 6             | -3.082223               | -0.845711 | 0.210551  |
| 1             | -3.124500               | -0.984829 | 1.296191  |
| 1             | -3.866289               | -0.132269 | -0.065355 |
| 1             | -3.324668               | -1.805800 | -0.257972 |
| 6             | 0.488860                | -1.632765 | -0.791765 |
| 1             | -0.008673               | -1.994127 | -1.693688 |
| 1             | 1.174394                | -2.398831 | -0.422921 |
| 6             | 1.350798                | 0.405520  | -0.067529 |
| 8             | 1.914342                | 1.496060  | -0.259726 |
| 6             | -1.128478               | 2.210209  | -0.330545 |
| 1             | -2.148903               | 2.534510  | -0.562788 |
| 1             | -0.634986               | 3.023694  | 0.209862  |
| 1             | -0.600988               | 2.070338  | -1.277917 |
| 6             | -1.165822               | 0.926899  | 0.483492  |
| 1             | -1.715821               | 1.104525  | 1.413821  |
| 8             | 2.615047                | -0.654837 | 1.043716  |
| 1             | 3.332359                | -0.725160 | 0.399103  |

E(RB3LYP-D3) = -538.6225303 (Hartree)

Sum of electronic and thermal free energies = -538.458763 (Hartree)

## BAC2\_0H2O\_Int Cartesian Coordinates

| Atomic Number | Coordinates (Angstroms) |           |           |
|---------------|-------------------------|-----------|-----------|
|               | X                       | Y         | Z         |
| 8             | 1.228395                | -0.629498 | -1.114296 |
| 6             | 0.160591                | 0.148326  | 0.873989  |
| 6             | -0.532071               | -1.151676 | 0.362494  |
| 1             | 0.389242                | 0.209185  | 1.938075  |
| 1             | -0.844981               | -1.876967 | 1.116889  |
| 6             | -1.691401               | -0.300690 | -0.228394 |
| 1             | -1.601007               | -0.235067 | -1.319560 |
| 6             | -3.109870               | -0.693959 | 0.148191  |
| 1             | -3.215001               | -0.785705 | 1.234747  |
| 1             | -3.833887               | 0.053607  | -0.194563 |
| 1             | -3.390203               | -1.655785 | -0.295557 |
| 6             | 0.435921                | -1.737206 | -0.661944 |
| 1             | -0.067565               | -2.171306 | -1.530287 |
| 1             | 1.081572                | -2.501690 | -0.213143 |
| 6             | 1.478906                | 0.257551  | 0.065059  |
| 8             | 1.959021                | 1.405992  | -0.319604 |
| 6             | -1.013087               | 2.227134  | -0.404842 |
| 1             | -2.023798               | 2.569713  | -0.655917 |
| 1             | -0.505551               | 3.044948  | 0.115659  |
| 1             | -0.479531               | 2.046843  | -1.340503 |
| 6             | -1.098706               | 0.969203  | 0.445772  |
| 1             | -1.671577               | 1.197598  | 1.352186  |
| 8             | 2.448412                | -0.499486 | 0.902986  |
| 1             | 3.293970                | -0.423532 | 0.437344  |

E(RB3LYP-D3) = -538.6308996 (Hartree)

Sum of electronic and thermal free energies = -538.465145 (Hartree)

## BAC2\_0H2O\_TS2 Cartesian Coordinates

| Atomic Number | Coordinates (Angstroms) |           |           |
|---------------|-------------------------|-----------|-----------|
|               | X                       | Y         | Z         |
| 8             | -1.072615               | -0.869018 | 1.338549  |
| 6             | -0.174590               | 0.180993  | -0.871807 |
| 6             | 0.556413                | -1.111229 | -0.388533 |
| 1             | -0.315455               | 0.235399  | -1.954476 |
| 1             | 0.878709                | -1.782486 | -1.190987 |
| 6             | 1.708618                | -0.238512 | 0.184587  |
| 1             | 1.685968                | -0.241561 | 1.280834  |
| 6             | 3.115625                | -0.541903 | -0.304056 |
| 1             | 3.155826                | -0.556038 | -1.398856 |
| 1             | 3.830269                | 0.211874  | 0.045296  |
| 1             | 3.461290                | -1.518246 | 0.053565  |
| 6             | -0.307251               | -1.824837 | 0.655841  |
| 1             | 0.349841                | -2.391705 | 1.340305  |
| 1             | -0.947741               | -2.572716 | 0.150748  |
| 6             | -1.552210               | 0.346113  | -0.260894 |
| 8             | -2.022371               | 1.380684  | 0.238117  |
| 6             | 0.854677                | 2.194978  | 0.604087  |
| 1             | 1.840937                | 2.563435  | 0.909129  |
| 1             | 0.306876                | 3.034243  | 0.166308  |
| 1             | 0.322097                | 1.881516  | 1.504326  |
| 6             | 1.030084                | 1.044437  | -0.375916 |
| 1             | 1.578700                | 1.409182  | -1.251295 |
| 8             | -2.431920               | -0.538393 | -0.896908 |
| 1             | -3.320268               | -0.359318 | -0.552807 |

E(RB3LYP-D3) = -538.6220567 (Hartree)

Sum of electronic and thermal free energies = -538.457324 (Hartree)

## BAC2\_1H2O\_R Cartesian Coordinates

| Atomic Number | Coordinates (Angstroms) |           |           |
|---------------|-------------------------|-----------|-----------|
|               | X                       | Y         | Z         |
| 8             | 0.762524                | -0.642345 | 1.354526  |
| 6             | -0.258768               | -0.194097 | -0.724932 |
| 6             | -0.414083               | 1.054156  | 0.176983  |
| 1             | 0.276931                | -0.130918 | -1.672310 |
| 1             | -0.229157               | 2.015521  | -0.302898 |
| 6             | -1.923089               | 0.716209  | 0.358497  |
| 1             | -2.077948               | 0.198442  | 1.312586  |
| 6             | -2.924272               | 1.845589  | 0.205357  |
| 1             | -2.768218               | 2.379582  | -0.737736 |
| 1             | -3.951102               | 1.465487  | 0.210016  |
| 1             | -2.832952               | 2.571005  | 1.020525  |
| 6             | 0.505721                | 0.803616  | 1.361851  |
| 1             | 0.062159                | 1.039780  | 2.328643  |
| 1             | 1.474409                | 1.294598  | 1.265070  |
| 6             | 0.419892                | -1.197255 | 0.169099  |
| 8             | 0.657543                | -2.367374 | -0.059180 |
| 6             | -2.481413               | -1.676807 | -0.619586 |
| 1             | -3.570261               | -1.563910 | -0.615009 |
| 1             | -2.219913               | -2.363777 | -1.430280 |
| 1             | -2.192867               | -2.145963 | 0.325722  |
| 6             | -1.817903               | -0.323637 | -0.796413 |
| 1             | -2.142364               | 0.134078  | -1.735679 |
| 8             | 3.859061                | -0.156986 | 0.243015  |
| 1             | 3.136531                | -0.574520 | 0.728366  |
| 8             | 2.875437                | 1.536988  | -1.468354 |
| 1             | 3.215750                | 0.861252  | -0.778383 |
| 1             | 1.945969                | 1.690434  | -1.263821 |

E(RB3LYP-D3) = -615.1125038 (Hartree)

Sum of electronic and thermal free energies = -614.933090 (Hartree)

## BAC2\_1H2O\_TS1 Cartesian Coordinates

| Atomic Number | Coordinates (Angstroms) |           |           |
|---------------|-------------------------|-----------|-----------|
|               | X                       | Y         | Z         |
| 8             | -0.696645               | 0.728561  | 1.461530  |
| 6             | 0.045795                | 0.158688  | -0.721979 |
| 6             | 0.227106                | -1.060565 | 0.224207  |
| 1             | -0.452552               | 0.012245  | -1.677308 |
| 1             | -0.021445               | -2.042008 | -0.182706 |
| 6             | 1.753399                | -0.769766 | 0.305159  |
| 1             | 2.006152                | -0.307908 | 1.267131  |
| 6             | 2.697388                | -1.925337 | 0.021193  |
| 1             | 2.445599                | -2.411023 | -0.927724 |
| 1             | 3.735641                | -1.582269 | -0.044674 |
| 1             | 2.646913                | -2.685541 | 0.808380  |
| 6             | -0.580635               | -0.714153 | 1.469822  |
| 1             | -0.084804               | -0.994065 | 2.401321  |
| 1             | -1.582511               | -1.149737 | 1.447982  |
| 6             | -0.715901               | 1.181894  | 0.120712  |
| 8             | -0.687330               | 2.420813  | -0.040719 |
| 6             | 2.279621                | 1.656154  | -0.558926 |
| 1             | 3.367668                | 1.526786  | -0.553605 |
| 1             | 2.034983                | 2.384816  | -1.337847 |
| 1             | 1.990785                | 2.086724  | 0.403233  |
| 6             | 1.601877                | 0.316579  | -0.798529 |
| 1             | 1.934053                | -0.087880 | -1.760999 |
| 8             | -2.437585               | 0.615063  | -0.367478 |
| 1             | -2.947327               | 0.859697  | 0.416590  |
| 8             | -2.923316               | -1.918407 | -0.974155 |
| 1             | -2.709333               | -0.971380 | -0.717646 |
| 1             | -2.256713               | -2.467655 | -0.545515 |

E(RB3LYP-D3) = -615.0978125 (Hartree)

Sum of electronic and thermal free energies = -614.912593 (Hartree)

## BAC2\_1H2O\_Int Cartesian Coordinates

| Atomic Number | Coordinates (Angstroms) |           |           |
|---------------|-------------------------|-----------|-----------|
|               | X                       | Y         | Z         |
| 8             | 0.863014                | -0.747914 | -0.843587 |
| 6             | -0.462268               | -0.033825 | 1.001358  |
| 6             | -1.214282               | -1.139951 | 0.198514  |
| 1             | -0.448100               | -0.123763 | 2.087469  |
| 1             | -1.763894               | -1.885725 | 0.776697  |
| 6             | -2.106656               | -0.052665 | -0.463673 |
| 1             | -1.806718               | 0.108807  | -1.506229 |
| 6             | -3.611861               | -0.243963 | -0.383922 |
| 1             | -3.928322               | -0.429578 | 0.648284  |
| 1             | -4.144571               | 0.644395  | -0.740935 |
| 1             | -3.940139               | -1.095102 | -0.990799 |
| 6             | -0.152492               | -1.755361 | -0.709094 |
| 1             | -0.524449               | -1.993458 | -1.709095 |
| 1             | 0.277249                | -2.662688 | -0.268889 |
| 6             | 0.989050                | -0.066353 | 0.469255  |
| 8             | 1.690467                | 1.036535  | 0.345465  |
| 6             | -1.034737               | 2.325219  | -0.197064 |
| 1             | -1.913209               | 2.857081  | -0.580868 |
| 1             | -0.523020               | 2.991839  | 0.503413  |
| 1             | -0.360740               | 2.144267  | -1.036995 |
| 6             | -1.475776               | 1.026886  | 0.461604  |
| 1             | -2.174718               | 1.264258  | 1.271898  |
| 8             | 1.657639                | -1.048187 | 1.350915  |
| 1             | 2.576091                | -1.086261 | 1.046427  |
| 8             | 4.046380                | 0.542677  | -0.830510 |
| 1             | 3.865080                | -0.080546 | -1.544189 |
| 1             | 3.163590                | 0.721668  | -0.396324 |

E(RB3LYP-D3) = -615.1034418 (Hartree)

Sum of electronic and thermal free energies = -614.918328 (Hartree)

## BAC2\_1H2O\_TS2 Cartesian Coordinates

| Atomic Number | Coordinates (Angstroms) |           |           |
|---------------|-------------------------|-----------|-----------|
|               | X                       | Y         | Z         |
| 8             | 1.076365                | -0.562828 | -0.805812 |
| 6             | -0.475650               | 0.455765  | 0.929425  |
| 6             | -0.748149               | -1.050436 | 0.624293  |
| 1             | -0.540614               | 0.730196  | 1.984684  |
| 1             | -1.042907               | -1.655401 | 1.486444  |
| 6             | -1.939474               | -0.646310 | -0.289258 |
| 1             | -1.681093               | -0.794365 | -1.344552 |
| 6             | -3.288555               | -1.280949 | 0.005153  |
| 1             | -3.557755               | -1.157477 | 1.059897  |
| 1             | -4.082822               | -0.825328 | -0.596712 |
| 1             | -3.281398               | -2.354786 | -0.212588 |
| 6             | 0.467313                | -1.622842 | -0.104769 |
| 1             | 0.157351                | -2.423156 | -0.794046 |
| 1             | 1.168676                | -2.071417 | 0.618503  |
| 6             | 0.910882                | 0.875170  | 0.454825  |
| 8             | 1.189067                | 1.923589  | -0.166883 |
| 6             | -1.724998               | 1.857998  | -1.017571 |
| 1             | -2.704776               | 1.880249  | -1.508494 |
| 1             | -1.507418               | 2.869978  | -0.663988 |
| 1             | -0.979481               | 1.600315  | -1.772650 |
| 6             | -1.753050               | 0.843702  | 0.116094  |
| 1             | -2.533480               | 1.135048  | 0.827877  |
| 8             | 1.841719                | 0.430902  | 1.416666  |
| 1             | 2.708996                | 0.768263  | 1.146909  |
| 8             | 3.701161                | -0.878500 | -0.904769 |
| 1             | 2.705288                | -0.756459 | -0.860556 |
| 1             | 4.015011                | -0.843554 | 0.006506  |

E(RB3LYP-D3) = -615.097394 (Hartree)

Sum of electronic and thermal free energies = -614.912390 (Hartree)



## BAC2\_2H2O\_R Cartesian Coordinates

| Atomic Number | Coordinates (Angstroms) |           |           |
|---------------|-------------------------|-----------|-----------|
|               | X                       | Y         | Z         |
| 8             | -0.658519               | -0.871926 | 0.582909  |
| 6             | 1.577592                | -1.251334 | -0.052028 |
| 6             | 1.571588                | -0.411150 | 1.248630  |
| 1             | 2.070806                | -2.222971 | -0.084854 |
| 1             | 2.294135                | -0.704185 | 2.009603  |
| 6             | 1.986581                | 0.843710  | 0.425666  |
| 1             | 1.108276                | 1.465870  | 0.219367  |
| 6             | 3.118150                | 1.697751  | 0.965508  |
| 1             | 3.996446                | 1.084405  | 1.192063  |
| 1             | 3.418458                | 2.458818  | 0.237924  |
| 1             | 2.822470                | 2.213188  | 1.885237  |
| 6             | 0.137544                | -0.466736 | 1.750430  |
| 1             | -0.260114               | 0.490995  | 2.083236  |
| 1             | -0.022676               | -1.225544 | 2.517018  |
| 6             | 0.119736                | -1.410320 | -0.386770 |
| 8             | -0.380823               | -1.914692 | -1.370678 |
| 6             | 1.801779                | 0.369269  | -2.167055 |
| 1             | 2.353371                | 1.256352  | -2.494256 |
| 1             | 1.948034                | -0.412207 | -2.918953 |
| 1             | 0.738945                | 0.628147  | -2.151667 |
| 6             | 2.289449                | -0.070176 | -0.798732 |
| 1             | 3.358201                | -0.300374 | -0.835581 |
| 8             | -4.243461               | 1.385383  | -0.283015 |
| 1             | -4.613946               | 1.250285  | -1.163945 |
| 8             | -1.679723               | 1.917328  | -0.522367 |
| 1             | -2.668652               | 1.713987  | -0.445588 |
| 1             | -1.221081               | 1.098342  | -0.296053 |
| 8             | -3.593793               | -0.956871 | 0.754961  |
| 1             | -3.858105               | -0.071543 | 0.350056  |
| 1             | -2.628530               | -1.003423 | 0.688013  |

E(RB3LYP-D3) = -691.5886053 (Hartree)

Sum of electronic and thermal free energies = -691.388735 (Hartree)

## BAC2\_2H2O\_TS1 Cartesian Coordinates

| Atomic Number | Coordinates (Angstroms) |           |           |
|---------------|-------------------------|-----------|-----------|
|               | X                       | Y         | Z         |
| 8             | 0.155379                | 0.113405  | 1.835976  |
| 6             | -0.153528               | -0.191947 | -0.501635 |
| 6             | -0.911752               | 1.082693  | -0.035702 |
| 1             | 0.495835                | -0.123728 | -1.371442 |
| 1             | -0.867810               | 1.951566  | -0.694499 |
| 6             | -2.256266               | 0.301680  | -0.094151 |
| 1             | -2.594436               | 0.042191  | 0.916301  |
| 6             | -3.394946               | 0.935336  | -0.874648 |
| 1             | -3.068013               | 1.220013  | -1.880570 |
| 1             | -4.236785               | 0.242500  | -0.981151 |
| 1             | -3.766947               | 1.837847  | -0.377384 |
| 6             | -0.373967               | 1.372114  | 1.361402  |
| 1             | -1.145242               | 1.687828  | 2.066902  |
| 1             | 0.427914                | 2.114724  | 1.349013  |
| 6             | 0.656106                | -0.624491 | 0.726007  |
| 8             | 1.005564                | -1.804284 | 0.979785  |
| 6             | -1.817283               | -2.288233 | -0.196217 |
| 1             | -2.860849               | -2.555181 | -0.397524 |
| 1             | -1.183988               | -3.055592 | -0.651752 |
| 1             | -1.665163               | -2.329075 | 0.884995  |
| 6             | -1.523487               | -0.903679 | -0.751356 |
| 1             | -1.711331               | -0.902844 | -1.830800 |
| 8             | 2.138567                | 0.316898  | 0.357710  |
| 1             | 2.600234                | 0.326790  | 1.207046  |
| 8             | 2.074238                | 2.687278  | -0.897725 |
| 1             | 2.066718                | 1.821827  | -0.407231 |
| 1             | 1.190388                | 3.058279  | -0.791102 |
| 8             | 3.288561                | -1.375996 | -1.379989 |
| 1             | 2.887972                | -0.743493 | -0.724456 |
| 1             | 2.783760                | -2.192884 | -1.284602 |

E(RB3LYP-D3) = -691.5706696 (Hartree)

Sum of electronic and thermal free energies = -691.366966 (Hartree)

## BAC2\_2H2O\_Int Cartesian Coordinates

| Atomic Number | Coordinates (Angstroms) |           |           |
|---------------|-------------------------|-----------|-----------|
|               | X                       | Y         | Z         |
| 8             | 0.092129                | 0.126916  | 1.866196  |
| 6             | -0.130267               | -0.184112 | -0.486633 |
| 6             | -0.888601               | 1.102705  | -0.044824 |
| 1             | 0.517104                | -0.114694 | -1.360000 |
| 1             | -0.817308               | 1.970718  | -0.703820 |
| 6             | -2.239099               | 0.337470  | -0.138538 |
| 1             | -2.616139               | 0.097778  | 0.863114  |
| 6             | -3.342232               | 0.972919  | -0.967694 |
| 1             | -2.976820               | 1.239353  | -1.965441 |
| 1             | -4.188086               | 0.288257  | -1.094711 |
| 1             | -3.721456               | 1.886799  | -0.497137 |
| 6             | -0.390109               | 1.388306  | 1.368828  |
| 1             | -1.178170               | 1.733707  | 2.042719  |
| 1             | 0.422605                | 2.122376  | 1.370814  |
| 6             | 0.710224                | -0.598729 | 0.743902  |
| 8             | 0.948217                | -1.833112 | 1.035572  |
| 6             | -1.839997               | -2.255311 | -0.185646 |
| 1             | -2.882639               | -2.500823 | -0.418801 |
| 1             | -1.210892               | -3.045024 | -0.606985 |
| 1             | -1.725710               | -2.282150 | 0.899998  |
| 6             | -1.500177               | -0.885883 | -0.753362 |
| 1             | -1.663999               | -0.902741 | -1.836973 |
| 8             | 2.024744                | 0.170631  | 0.496327  |
| 1             | 2.545011                | 0.065251  | 1.305910  |
| 8             | 2.197031                | 2.578540  | -0.828741 |
| 1             | 2.102841                | 1.735220  | -0.332443 |
| 1             | 1.308065                | 2.949583  | -0.881716 |
| 8             | 3.262671                | -1.255632 | -1.524556 |
| 1             | 2.848101                | -0.727186 | -0.806194 |
| 1             | 2.760706                | -2.079366 | -1.552905 |

E(RB3LYP-D3) = -691.5723884 (Hartree)

Sum of electronic and thermal free energies = -691.367324 (Hartree)

## BAC2\_2H2O\_TS2 Cartesian Coordinates

| Atomic Number | Coordinates (Angstroms) |           |           |
|---------------|-------------------------|-----------|-----------|
|               | X                       | Y         | Z         |
| 8             | -0.595374               | -0.686954 | 0.736761  |
| 6             | 0.855893                | 0.556287  | -0.875779 |
| 6             | 1.226592                | -0.953724 | -0.744700 |
| 1             | 0.891422                | 0.955519  | -1.891684 |
| 1             | 1.527458                | -1.452301 | -1.670263 |
| 6             | 2.416736                | -0.579418 | 0.183234  |
| 1             | 2.210437                | -0.877732 | 1.218171  |
| 6             | 3.795077                | -1.070002 | -0.228708 |
| 1             | 4.013736                | -0.797519 | -1.267047 |
| 1             | 4.577785                | -0.633506 | 0.401827  |
| 1             | 3.872409                | -2.160023 | -0.147910 |
| 6             | 0.060073                | -1.658636 | -0.051408 |
| 1             | 0.420958                | -2.485115 | 0.577394  |
| 1             | -0.629609               | -2.087891 | -0.795620 |
| 6             | -0.557034               | 0.807223  | -0.347615 |
| 8             | -0.896172               | 1.786430  | 0.369543  |
| 6             | 2.024558                | 1.783539  | 1.231114  |
| 1             | 3.004149                | 1.808389  | 1.722604  |
| 1             | 1.734975                | 2.815934  | 1.015146  |
| 1             | 1.304193                | 1.377198  | 1.944220  |
| 6             | 2.113897                | 0.932404  | -0.027062 |
| 1             | 2.862006                | 1.373410  | -0.695364 |
| 8             | -1.454319               | 0.414617  | -1.360871 |
| 1             | -2.369740               | 0.584667  | -1.047570 |
| 8             | -3.089627               | -1.312568 | 1.275908  |
| 1             | -2.126363               | -1.095224 | 1.066824  |
| 1             | -3.252696               | -2.196545 | 0.925399  |
| 8             | -4.106145               | 0.547941  | -0.434100 |
| 1             | -3.863012               | -0.156576 | 0.213643  |
| 1             | -4.659784               | 0.125536  | -1.102145 |

E(RB3LYP-D3) = -691.570077 (Hartree)

Sum of electronic and thermal free energies = -691.362274 (Hartree)

## BAC2\_3H2O\_R Cartesian Coordinates

| Atomic Number | Coordinates (Angstroms) |           |           |
|---------------|-------------------------|-----------|-----------|
|               | X                       | Y         | Z         |
| 8             | 0.210581                | 0.086505  | 0.967701  |
| 6             | -1.240750               | 0.043864  | -0.889407 |
| 6             | -1.721096               | 1.149922  | 0.081470  |
| 1             | -0.954241               | 0.287480  | -1.912743 |
| 1             | -2.017152               | 2.092596  | -0.377683 |
| 6             | -2.914708               | 0.241758  | 0.502157  |
| 1             | -2.685350               | -0.263831 | 1.447709  |
| 6             | -4.293800               | 0.870654  | 0.564868  |
| 1             | -4.526702               | 1.393995  | -0.368280 |
| 1             | -5.066073               | 0.111312  | 0.725740  |
| 1             | -4.362877               | 1.595777  | 1.382479  |
| 6             | -0.589029               | 1.314626  | 1.082807  |
| 1             | -0.913705               | 1.380996  | 2.120468  |
| 1             | 0.078133                | 2.144145  | 0.846989  |
| 6             | -0.071614               | -0.573141 | -0.171695 |
| 8             | 0.574717                | -1.551413 | -0.502672 |
| 6             | -2.620134               | -2.204768 | -0.457267 |
| 1             | -3.642024               | -2.541198 | -0.255232 |
| 1             | -2.252512               | -2.755707 | -1.328317 |
| 1             | -2.003286               | -2.483218 | 0.402476  |
| 6             | -2.602562               | -0.706008 | -0.694034 |
| 1             | -3.241743               | -0.451663 | -1.544607 |
| 8             | 2.980803                | 1.572272  | 0.528245  |
| 1             | 2.327889                | 1.048483  | 1.009813  |
| 8             | 3.096405                | -2.261328 | 0.679104  |
| 1             | 2.223284                | -1.988966 | 0.346100  |
| 1             | 3.722420                | -1.556219 | 0.402681  |
| 8             | 4.769195                | -0.178480 | -0.077704 |
| 1             | 4.084542                | 0.549416  | 0.170293  |
| 1             | 5.491213                | -0.107992 | 0.558103  |
| 8             | 1.747662                | 1.947375  | -1.758923 |
| 1             | 2.218140                | 1.797429  | -0.872486 |
| 1             | 0.807292                | 2.006272  | -1.552895 |

E(RB3LYP-D3) = -768.0598828 (Hartree)

Sum of electronic and thermal free energies = -767.837208 (Hartree)

## BAC2\_3H2O\_TS1 Cartesian Coordinates

| Atomic Number | Coordinates (Angstroms) |           |           |
|---------------|-------------------------|-----------|-----------|
|               | X                       | Y         | Z         |
| 8             | 0.568027                | -0.269440 | 1.001983  |
| 6             | -0.868230               | 0.127562  | -0.838493 |
| 6             | -1.415060               | 0.875633  | 0.410106  |
| 1             | -0.789114               | 0.666742  | -1.779158 |
| 1             | -1.804988               | 1.882143  | 0.252569  |
| 6             | -2.507054               | -0.218251 | 0.589053  |
| 1             | -2.271044               | -0.867127 | 1.440856  |
| 6             | -3.947430               | 0.255270  | 0.682591  |
| 1             | -4.194485               | 0.921942  | -0.150608 |
| 1             | -4.644582               | -0.589105 | 0.652345  |
| 1             | -4.127850               | 0.803932  | 1.613411  |
| 6             | -0.270988               | 0.836178  | 1.418141  |
| 1             | -0.595744               | 0.628454  | 2.439082  |
| 1             | 0.324704                | 1.751705  | 1.407920  |
| 6             | 0.500996                | -0.384555 | -0.396261 |
| 8             | 1.087815                | -1.375355 | -0.904744 |
| 6             | -1.830943               | -2.382563 | -0.735386 |
| 1             | -2.777005               | -2.903582 | -0.551085 |
| 1             | -1.431489               | -2.743886 | -1.687738 |
| 1             | -1.131364               | -2.674286 | 0.052122  |
| 6             | -2.064575               | -0.880353 | -0.748446 |
| 1             | -2.778699               | -0.632974 | -1.541143 |
| 8             | 1.512471                | 1.103527  | -0.825269 |
| 1             | 1.699422                | 0.932722  | -1.757589 |
| 8             | 3.276660                | -2.219442 | 0.482346  |
| 1             | 2.998454                | -2.478998 | 1.368968  |
| 1             | 2.452522                | -1.950643 | 0.004024  |
| 8             | 3.824640                | 0.584779  | 0.498181  |
| 1             | 3.793655                | -0.386556 | 0.580481  |
| 1             | 2.986356                | 0.816174  | 0.020040  |
| 8             | 0.496962                | 3.580374  | -0.724364 |
| 1             | -0.262988               | 3.570145  | -0.130607 |
| 1             | 0.841339                | 2.644127  | -0.746788 |

E(RB3LYP-D3) = -768.0444923 (Hartree)

Sum of electronic and thermal free energies = -767.817613 (Hartree)

## BAC2\_3H2O\_Int Cartesian Coordinates

| Atomic Number | Coordinates (Angstroms) |           |           |
|---------------|-------------------------|-----------|-----------|
|               | X                       | Y         | Z         |
| 8             | 0.574308                | -0.217724 | 1.013025  |
| 6             | -0.870623               | 0.139563  | -0.831660 |
| 6             | -1.443360               | 0.863167  | 0.424521  |
| 1             | -0.856034               | 0.692810  | -1.770306 |
| 1             | -1.864976               | 1.859556  | 0.278542  |
| 6             | -2.500263               | -0.263896 | 0.595076  |
| 1             | -2.262378               | -0.896263 | 1.458975  |
| 6             | -3.956694               | 0.165440  | 0.655072  |
| 1             | -4.207144               | 0.817101  | -0.189105 |
| 1             | -4.627195               | -0.700174 | 0.617765  |
| 1             | -4.174144               | 0.716377  | 1.576752  |
| 6             | -0.298893               | 0.848977  | 1.435647  |
| 1             | -0.623858               | 0.626219  | 2.454498  |
| 1             | 0.253362                | 1.794341  | 1.440022  |
| 6             | 0.571648                | -0.248684 | -0.438347 |
| 8             | 1.124421                | -1.323100 | -0.923606 |
| 6             | -1.727383               | -2.416620 | -0.677350 |
| 1             | -2.656887               | -2.961352 | -0.475284 |
| 1             | -1.319728               | -2.792123 | -1.620468 |
| 1             | -1.016086               | -2.663718 | 0.113942  |
| 6             | -2.014040               | -0.923623 | -0.727868 |
| 1             | -2.738035               | -0.728852 | -1.526965 |
| 8             | 1.420972                | 0.989563  | -0.775931 |
| 1             | 1.688506                | 0.867687  | -1.697361 |
| 8             | 3.304121                | -2.130622 | 0.384941  |
| 1             | 3.024982                | -2.469914 | 1.243787  |
| 1             | 2.468816                | -1.840528 | -0.085993 |
| 8             | 3.845940                | 0.625189  | 0.599017  |
| 1             | 3.822966                | -0.352367 | 0.620585  |
| 1             | 3.004714                | 0.862518  | 0.156620  |
| 8             | 0.384248                | 3.554125  | -0.816506 |
| 1             | -0.420050               | 3.576331  | -0.284279 |
| 1             | 0.708744                | 2.626970  | -0.769795 |

E(RB3LYP-D3) = -768.0474147 (Hartree)

Sum of electronic and thermal free energies = -767.818640 (Hartree)

## BAC2\_3H2O\_TS2 Cartesian Coordinates

| Atomic Number | Coordinates (Angstroms) |           |           |
|---------------|-------------------------|-----------|-----------|
|               | X                       | Y         | Z         |
| 8             | 0.264262                | 0.494392  | 0.813061  |
| 6             | -1.222016               | -0.650440 | -0.823158 |
| 6             | -1.388904               | 0.900472  | -0.828550 |
| 1             | -1.262728               | -1.121996 | -1.807373 |
| 1             | -1.535609               | 1.364229  | -1.807919 |
| 6             | -2.692959               | 0.761762  | 0.007277  |
| 1             | -2.552843               | 1.148180  | 1.024013  |
| 6             | -3.957117               | 1.351211  | -0.597280 |
| 1             | -4.105937               | 0.992254  | -1.621613 |
| 1             | -4.843242               | 1.073462  | -0.015620 |
| 1             | -3.911075               | 2.445422  | -0.632161 |
| 6             | -0.195082               | 1.491443  | -0.075887 |
| 1             | -0.489204               | 2.394867  | 0.477212  |
| 1             | 0.601698                | 1.781955  | -0.779836 |
| 6             | 0.113029                | -1.044178 | -0.191809 |
| 8             | 0.279860                | -2.015780 | 0.593861  |
| 6             | -2.624512               | -1.494175 | 1.320744  |
| 1             | -3.618456               | -1.347156 | 1.759266  |
| 1             | -2.454645               | -2.571020 | 1.234866  |
| 1             | -1.888187               | -1.095045 | 2.021486  |
| 6             | -2.559687               | -0.789368 | -0.026450 |
| 1             | -3.321184               | -1.221144 | -0.685307 |
| 8             | 1.110546                | -0.823316 | -1.160042 |
| 1             | 1.973304                | -1.138819 | -0.812202 |
| 8             | 2.579386                | 1.224356  | 1.799325  |
| 1             | 1.689141                | 0.917721  | 1.435057  |
| 1             | 2.424702                | 2.084928  | 2.207235  |
| 8             | 3.946263                | 1.340945  | -0.536684 |
| 1             | 3.468233                | 1.381110  | 0.328493  |
| 1             | 3.290272                | 1.565599  | -1.208814 |
| 8             | 3.766566                | -1.410880 | -0.505097 |
| 1             | 3.971653                | -0.452214 | -0.583389 |
| 1             | 4.152514                | -1.840424 | -1.278116 |

E(RB3LYP-D3) = -768.039011 (Hartree)

Sum of electronic and thermal free energies = -767.811077 (Hartree)



## BAC2\_4H2O\_R Cartesian Coordinates

| Atomic Number | Coordinates (Angstroms) |           |           |
|---------------|-------------------------|-----------|-----------|
|               | X                       | Y         | Z         |
| 8             | 0.250196                | 1.214107  | -1.439804 |
| 6             | 0.781870                | -0.253774 | 0.328934  |
| 6             | 1.550012                | 1.070439  | 0.548818  |
| 1             | 0.060753                | -0.605725 | 1.064676  |
| 1             | 1.542545                | 1.459584  | 1.567116  |
| 6             | 2.873311                | 0.351208  | 0.151616  |
| 1             | 3.118601                | 0.570943  | -0.894310 |
| 6             | 4.088166                | 0.569183  | 1.033465  |
| 1             | 3.848862                | 0.368736  | 2.082943  |
| 1             | 4.909545                | -0.094397 | 0.743833  |
| 1             | 4.450826                | 1.600023  | 0.963089  |
| 6             | 0.954105                | 2.047230  | -0.453949 |
| 1             | 1.692376                | 2.628517  | -1.005251 |
| 1             | 0.208255                | 2.711253  | -0.016742 |
| 6             | 0.089085                | -0.051544 | -0.989626 |
| 8             | -0.541525               | -0.861702 | -1.641397 |
| 6             | 2.374781                | -2.045982 | -0.849545 |
| 1             | 3.402879                | -2.419315 | -0.804909 |
| 1             | 1.702358                | -2.903196 | -0.748711 |
| 1             | 2.222177                | -1.612928 | -1.842629 |
| 6             | 2.143445                | -1.022269 | 0.246542  |
| 1             | 2.326119                | -1.473072 | 1.226397  |
| 8             | -2.473838               | -1.055251 | 1.631917  |
| 1             | -3.090178               | -1.328817 | 2.321892  |
| 8             | -1.311215               | -3.008735 | 0.253318  |
| 1             | -1.759080               | -2.312901 | 0.818748  |
| 1             | -0.942848               | -2.510953 | -0.492771 |
| 8             | -1.894128               | 1.483119  | 1.759109  |
| 1             | -0.942512               | 1.575166  | 1.887080  |
| 1             | -2.094970               | 0.485955  | 1.756062  |
| 8             | -3.812469               | -0.420436 | -0.616760 |
| 1             | -3.463336               | 0.465723  | -0.824735 |
| 1             | -3.336524               | -0.694037 | 0.216933  |
| 8             | -2.579627               | 2.162234  | -0.805564 |
| 1             | -2.280964               | 1.981869  | 0.118151  |
| 1             | -1.802681               | 2.013937  | -1.360945 |

E(RB3LYP-D3) = -844.5401091 (Hartree)

Sum of electronic and thermal free energies = -844.292360 (Hartree)

## BAC2\_4H2O\_TS1 Cartesian Coordinates

| Atomic Number | Coordinates (Angstroms) |           |           |
|---------------|-------------------------|-----------|-----------|
|               | X                       | Y         | Z         |
| 8             | 0.607022                | -0.141120 | 0.714630  |
| 6             | -1.012668               | 0.491484  | -0.887923 |
| 6             | -1.552850               | 0.798423  | 0.537538  |
| 1             | -1.085773               | 1.258848  | -1.654354 |
| 1             | -2.090590               | 1.737983  | 0.671016  |
| 6             | -2.461022               | -0.462664 | 0.467669  |
| 1             | -2.064423               | -1.261419 | 1.105702  |
| 6             | -3.940619               | -0.262782 | 0.746598  |
| 1             | -4.347986               | 0.547702  | 0.132780  |
| 1             | -4.511497               | -1.170384 | 0.522648  |
| 1             | -4.117891               | -0.007374 | 1.796939  |
| 6             | -0.337504               | 0.678921  | 1.449268  |
| 1             | -0.543312               | 0.164850  | 2.389190  |
| 1             | 0.130683                | 1.642934  | 1.656086  |
| 6             | 0.440194                | 0.088940  | -0.665492 |
| 8             | 1.110406                | -0.626884 | -1.443872 |
| 6             | -1.595960               | -2.085452 | -1.403094 |
| 1             | -2.441772               | -2.777451 | -1.325771 |
| 1             | -1.222905               | -2.128016 | -2.430577 |
| 1             | -0.804442               | -2.453993 | -0.744850 |
| 6             | -2.042758               | -0.684549 | -1.015012 |
| 1             | -2.847567               | -0.362784 | -1.684190 |
| 8             | 1.237689                | 1.790206  | -0.702723 |
| 1             | 1.390956                | 1.885935  | -1.651668 |
| 8             | 1.139234                | -2.743627 | 1.530622  |
| 1             | 0.853550                | -1.847308 | 1.260929  |
| 1             | 0.694989                | -3.350718 | 0.925724  |
| 8             | 3.279713                | -1.765968 | -0.197838 |
| 1             | 2.831942                | -2.237159 | 0.524943  |
| 1             | 2.535557                | -1.376831 | -0.714535 |
| 8             | 3.604694                | 1.047693  | 0.433350  |
| 1             | 3.607812                | 0.077715  | 0.341554  |
| 1             | 2.749050                | 1.341233  | 0.027052  |
| 8             | -0.128995               | 3.958123  | 0.050727  |
| 1             | -0.853800               | 3.665572  | 0.615596  |
| 1             | 0.358440                | 3.129361  | -0.220706 |

E(RB3LYP-D3) = -844.5169815 (Hartree)

Sum of electronic and thermal free energies = -844.267984 (Hartree)

## BAC2\_4H2O\_Int Cartesian Coordinates

| Atomic Number | Coordinates (Angstroms) |           |           |
|---------------|-------------------------|-----------|-----------|
|               | X                       | Y         | Z         |
| 8             | 0.174066                | -0.347871 | -0.485550 |
| 6             | -1.503503               | 0.323981  | 1.047698  |
| 6             | -1.785357               | -1.130103 | 0.554397  |
| 1             | -1.635663               | 0.516995  | 2.112282  |
| 1             | -2.128814               | -1.851617 | 1.298662  |
| 6             | -2.896397               | -0.596380 | -0.392793 |
| 1             | -2.585236               | -0.664763 | -1.442282 |
| 6             | -4.283165               | -1.195788 | -0.227090 |
| 1             | -4.602715               | -1.159104 | 0.820085  |
| 1             | -5.024743               | -0.649674 | -0.820590 |
| 1             | -4.307115               | -2.243809 | -0.545694 |
| 6             | -0.496575               | -1.568961 | -0.139789 |
| 1             | -0.672511               | -2.130577 | -1.060753 |
| 1             | 0.139162                | -2.168727 | 0.521827  |
| 6             | -0.037995               | 0.621191  | 0.661105  |
| 8             | 0.339660                | 1.824726  | 0.304482  |
| 6             | -2.499002               | 1.941474  | -0.876186 |
| 1             | -3.416123               | 2.040713  | -1.468444 |
| 1             | -2.291316               | 2.913221  | -0.419039 |
| 1             | -1.680119               | 1.715272  | -1.562637 |
| 6             | -2.682985               | 0.842973  | 0.160760  |
| 1             | -3.516504               | 1.116174  | 0.817477  |
| 8             | 0.733782                | 0.083168  | 1.769787  |
| 1             | 1.683133                | 0.230990  | 1.580908  |
| 8             | 2.361048                | -0.560903 | -2.035061 |
| 1             | 1.511771                | -0.471820 | -1.534700 |
| 1             | 2.141370                | -0.866897 | -2.923000 |
| 8             | 3.325500                | -2.163033 | -0.008153 |
| 1             | 3.044932                | -1.695922 | -0.824842 |
| 1             | 2.509114                | -2.477415 | 0.401993  |
| 8             | 3.561322                | 0.312838  | 1.326784  |
| 1             | 3.593135                | -0.570738 | 0.907388  |
| 1             | 3.446163                | 0.951210  | 0.590907  |
| 8             | 2.783924                | 1.960497  | -0.790736 |
| 1             | 2.802431                | 1.230987  | -1.434186 |
| 1             | 1.865097                | 1.929788  | -0.396395 |

E(RB3LYP-D3) = -844.5229907 (Hartree)

Sum of electronic and thermal free energies = -844.269318 (Hartree)

## BAC2\_4H2O\_TS2 Cartesian Coordinates

| Atomic Number | Coordinates (Angstroms) |           |           |
|---------------|-------------------------|-----------|-----------|
|               | X                       | Y         | Z         |
| 8             | 0.047527                | 0.728546  | -0.767463 |
| 6             | 1.523804                | -0.239169 | 1.023945  |
| 6             | 2.060052                | 1.100647  | 0.433283  |
| 1             | 1.640863                | -0.345595 | 2.104464  |
| 1             | 2.522141                | 1.784493  | 1.150600  |
| 6             | 3.082529                | 0.311504  | -0.431146 |
| 1             | 2.808970                | 0.351797  | -1.492336 |
| 6             | 4.549331                | 0.672991  | -0.263573 |
| 1             | 4.838596                | 0.656331  | 0.792971  |
| 1             | 5.196443                | -0.032316 | -0.796920 |
| 1             | 4.760624                | 1.676192  | -0.650257 |
| 6             | 0.919980                | 1.756682  | -0.343390 |
| 1             | 1.308490                | 2.314328  | -1.207846 |
| 1             | 0.388606                | 2.478791  | 0.298182  |
| 6             | 0.039156                | -0.419231 | 0.721619  |
| 8             | -0.472605               | -1.509327 | 0.345567  |
| 6             | 2.252636                | -2.142139 | -0.754202 |
| 1             | 3.151234                | -2.441137 | -1.306410 |
| 1             | 1.865717                | -3.027909 | -0.242824 |
| 1             | 1.503241                | -1.823511 | -1.481577 |
| 6             | 2.608735                | -1.023038 | 0.213609  |
| 1             | 3.366112                | -1.392315 | 0.913899  |
| 8             | -0.696199               | 0.357784  | 1.623382  |
| 1             | -1.644547               | 0.092901  | 1.578809  |
| 8             | -2.220086               | 2.021102  | -1.053883 |
| 1             | -1.377119               | 1.473944  | -0.951213 |
| 1             | -2.253042               | 2.599439  | -0.282096 |
| 8             | -4.227810               | 0.264910  | -0.806434 |
| 1             | -3.552343               | 0.973682  | -0.963404 |
| 1             | -5.094964               | 0.622088  | -1.030018 |
| 8             | -3.397780               | -0.266332 | 1.758067  |
| 1             | -3.798608               | -0.093882 | 0.877854  |
| 1             | -3.786960               | 0.377611  | 2.362537  |
| 8             | -2.642790               | -2.008700 | -1.275369 |
| 1             | -3.288325               | -1.285423 | -1.181341 |
| 1             | -1.894519               | -1.772862 | -0.684882 |

E(RB3LYP-D3) = -844.514776 (Hartree)

Sum of electronic and thermal free energies = -844.265939 (Hartree)

## BAC2\_5H2O\_R Cartesian Coordinates

| Atomic Number | Coordinates (Angstroms) |           |           |
|---------------|-------------------------|-----------|-----------|
|               | X                       | Y         | Z         |
| 8             | 1.208092                | -2.021389 | 1.061828  |
| 6             | 0.816429                | -0.018883 | -0.119065 |
| 6             | 1.909065                | -0.819697 | -0.867997 |
| 1             | -0.124870               | 0.226375  | -0.607873 |
| 1             | 1.803491                | -0.866616 | -1.951447 |
| 6             | 2.974955                | 0.202427  | -0.373963 |
| 1             | 3.497662                | -0.198112 | 0.502922  |
| 6             | 3.974075                | 0.729501  | -1.386330 |
| 1             | 3.462347                | 1.116484  | -2.273628 |
| 1             | 4.573018                | 1.542299  | -0.962703 |
| 1             | 4.662049                | -0.057446 | -1.712629 |
| 6             | 1.911677                | -2.194833 | -0.217752 |
| 1             | 2.904190                | -2.576559 | 0.019197  |
| 1             | 1.352418                | -2.942810 | -0.781831 |
| 6             | 0.545083                | -0.851386 | 1.101218  |
| 8             | -0.168541               | -0.579975 | 2.054189  |
| 6             | 1.947371                | 1.846663  | 1.428485  |
| 1             | 2.769912                | 2.568819  | 1.410420  |
| 1             | 1.031175                | 2.386671  | 1.682792  |
| 1             | 2.151266                | 1.131776  | 2.231443  |
| 6             | 1.831886                | 1.155756  | 0.083169  |
| 1             | 1.637000                | 1.892543  | -0.702306 |
| 8             | -2.111694               | 0.554178  | -2.089939 |
| 1             | -2.406546               | 0.706906  | -2.995518 |
| 8             | -1.743329               | 1.830820  | 1.822976  |
| 1             | -1.629728               | 2.138338  | 0.896727  |
| 1             | -1.191670               | 1.034227  | 1.905575  |
| 8             | -1.727431               | -1.954718 | -1.479579 |
| 1             | -0.779898               | -2.132149 | -1.453521 |
| 1             | -1.836980               | -0.988582 | -1.768804 |
| 8             | -4.180315               | 0.345731  | -0.369891 |
| 1             | -3.830273               | -0.326656 | 0.243254  |
| 1             | -3.455849               | 0.465678  | -1.043654 |
| 8             | -2.804361               | -1.742078 | 1.035704  |
| 1             | -2.364095               | -1.887198 | 0.164817  |
| 1             | -2.144092               | -1.298073 | 1.585430  |
| 8             | -1.402595               | 2.701449  | -0.792032 |
| 1             | -0.447952               | 2.808063  | -0.881092 |
| 1             | -1.654442               | 1.886583  | -1.340198 |

E(RB3LYP-D3) = -921.0132047 (Hartree)

Sum of electronic and thermal free energies = -920.745125 (Hartree)

## BAC2\_5H2O\_TS1 Cartesian Coordinates

| Atomic Number | Coordinates (Angstroms) |           |           |
|---------------|-------------------------|-----------|-----------|
|               | X                       | Y         | Z         |
| 8             | 0.632401                | -1.657271 | 0.478920  |
| 6             | 1.245430                | 0.401871  | -0.526459 |
| 6             | 2.126400                | -0.740356 | -1.111496 |
| 1             | 0.762386                | 1.095268  | -1.209659 |
| 1             | 2.315428                | -0.717135 | -2.185625 |
| 6             | 3.320271                | -0.268028 | -0.232380 |
| 1             | 3.474596                | -0.954439 | 0.608571  |
| 6             | 4.639843                | -0.009156 | -0.938579 |
| 1             | 4.500134                | 0.659052  | -1.795111 |
| 1             | 5.364112                | 0.459960  | -0.263926 |
| 1             | 5.083559                | -0.939335 | -1.309844 |
| 6             | 1.445325                | -2.028899 | -0.661153 |
| 1             | 2.142317                | -2.797517 | -0.323948 |
| 1             | 0.798493                | -2.453502 | -1.435618 |
| 6             | 0.201742                | -0.325981 | 0.322213  |
| 8             | -0.373946               | 0.180175  | 1.325018  |
| 6             | 2.464812                | 1.289468  | 1.703833  |
| 1             | 3.466035                | 1.577598  | 2.043013  |
| 1             | 1.784774                | 2.115141  | 1.932101  |
| 1             | 2.149924                | 0.424182  | 2.292138  |
| 6             | 2.498435                | 0.974821  | 0.216984  |
| 1             | 2.836603                | 1.860915  | -0.330731 |
| 8             | -1.117657               | -0.524532 | -0.896341 |
| 1             | -0.771510               | -0.895969 | -1.719226 |
| 8             | -0.986395               | 2.845248  | 0.869196  |
| 1             | -1.453028               | 2.692347  | 0.025089  |
| 1             | -0.688830               | 1.946024  | 1.129064  |
| 8             | -2.400213               | -1.315371 | 2.476835  |
| 1             | -2.892024               | -1.556576 | 1.669057  |
| 1             | -1.633040               | -0.802131 | 2.138991  |
| 8             | -3.392016               | -1.664285 | -0.128614 |
| 1             | -3.512047               | -2.531303 | -0.533624 |
| 1             | -2.507800               | -1.312814 | -0.438309 |
| 8             | -4.736777               | 0.605883  | -1.097955 |
| 1             | -3.934644               | 1.138116  | -1.269897 |
| 1             | -4.396605               | -0.243252 | -0.752413 |
| 8             | -2.226430               | 1.830160  | -1.440836 |
| 1             | -1.968356               | 2.116743  | -2.324929 |
| 1             | -1.765764               | 0.956135  | -1.272735 |

E(RB3LYP-D3) = -920.9906693 (Hartree)

Sum of electronic and thermal free energies = -920.720048 (Hartree)

## BAC2\_5H2O\_Int Cartesian Coordinates

| Atomic Number | Coordinates (Angstroms) |           |           |
|---------------|-------------------------|-----------|-----------|
|               | X                       | Y         | Z         |
| 8             | 0.651524                | -1.600818 | 0.660344  |
| 6             | 1.260734                | 0.311229  | -0.614508 |
| 6             | 2.170852                | -0.893680 | -1.006552 |
| 1             | 0.821288                | 0.901828  | -1.417425 |
| 1             | 2.395205                | -1.021119 | -2.067121 |
| 6             | 3.332238                | -0.288716 | -0.168793 |
| 1             | 3.472598                | -0.853142 | 0.760851  |
| 6             | 4.667865                | -0.105670 | -0.869264 |
| 1             | 4.542868                | 0.435139  | -1.813625 |
| 1             | 5.365952                | 0.465860  | -0.247885 |
| 1             | 5.136309                | -1.069541 | -1.096713 |
| 6             | 1.486136                | -2.114353 | -0.396927 |
| 1             | 2.183563                | -2.827203 | 0.047801  |
| 1             | 0.868467                | -2.647798 | -1.130852 |
| 6             | 0.135292                | -0.304611 | 0.248449  |
| 8             | -0.373681               | 0.356758  | 1.245275  |
| 6             | 2.422019                | 1.501525  | 1.517056  |
| 1             | 3.417751                | 1.841248  | 1.824817  |
| 1             | 1.734293                | 2.344637  | 1.624926  |
| 1             | 2.105732                | 0.721444  | 2.212508  |
| 6             | 2.482998                | 0.989489  | 0.086279  |
| 1             | 2.833982                | 1.798570  | -0.563969 |
| 8             | -1.007637               | -0.625972 | -0.724213 |
| 1             | -0.674483               | -1.080682 | -1.511581 |
| 8             | -0.970971               | 2.908991  | 0.527011  |
| 1             | -1.483882               | 2.706914  | -0.275622 |
| 1             | -0.687824               | 2.016180  | 0.847540  |
| 8             | -2.489020               | -0.681785 | 2.589185  |
| 1             | -1.696291               | -0.315824 | 2.119934  |
| 1             | -2.978105               | -1.152102 | 1.891679  |
| 8             | -3.363114               | -1.744336 | 0.109671  |
| 1             | -3.435440               | -2.675802 | -0.130395 |
| 1             | -2.474470               | -1.436864 | -0.187438 |
| 8             | -4.762034               | 0.300797  | -1.226462 |
| 1             | -3.982885               | 0.854937  | -1.429290 |
| 1             | -4.395818               | -0.474381 | -0.757664 |
| 8             | -2.306656               | 1.620629  | -1.629980 |
| 1             | -2.048194               | 1.794588  | -2.543130 |
| 1             | -1.796702               | 0.827725  | -1.338432 |

E(RB3LYP-D3) = -920.9929097 (Hartree)

Sum of electronic and thermal free energies = -920.721854 (Hartree)

## BAC2\_5H2O\_TS2 Cartesian Coordinates

| Atomic Number | Coordinates (Angstroms) |           |           |
|---------------|-------------------------|-----------|-----------|
|               | X                       | Y         | Z         |
| 8             | -0.047552               | -0.240225 | 0.893855  |
| 6             | 1.523866                | -0.943814 | -0.909796 |
| 6             | 2.070535                | -1.214139 | 0.525835  |
| 1             | 1.689781                | -1.743150 | -1.634600 |
| 1             | 2.638805                | -2.139488 | 0.650595  |
| 6             | 2.956304                | 0.059487  | 0.426888  |
| 1             | 2.544665                | 0.861498  | 1.050902  |
| 6             | 4.441131                | -0.101593 | 0.706395  |
| 1             | 4.866987                | -0.912611 | 0.105468  |
| 1             | 4.992595                | 0.814598  | 0.467567  |
| 1             | 4.626939                | -0.335787 | 1.760528  |
| 6             | 0.894683                | -1.112988 | 1.492048  |
| 1             | 1.209832                | -0.714264 | 2.465189  |
| 1             | 0.443608                | -2.101170 | 1.665021  |
| 6             | 0.017390                | -0.684129 | -0.867395 |
| 8             | -0.551595               | 0.239828  | -1.520788 |
| 6             | 2.087753                | 1.644220  | -1.466920 |
| 1             | 2.941953                | 2.327470  | -1.392469 |
| 1             | 1.723692                | 1.678770  | -2.497672 |
| 1             | 1.296643                | 2.026406  | -0.820239 |
| 6             | 2.527283                | 0.246276  | -1.056396 |
| 1             | 3.339214                | -0.075605 | -1.718258 |
| 8             | -0.642950               | -1.924011 | -0.837360 |
| 1             | -1.607403               | -1.758252 | -0.948554 |
| 8             | -2.417890               | -0.669755 | 1.971734  |
| 1             | -1.520063               | -0.510009 | 1.551218  |
| 1             | -2.664120               | -1.570371 | 1.725766  |
| 8             | -3.927741               | 0.734042  | 0.231949  |
| 1             | -3.441310               | 0.298123  | 0.976059  |
| 1             | -4.822516               | 0.919894  | 0.540631  |
| 8             | -3.403119               | -1.615658 | -1.181490 |
| 1             | -3.660191               | -0.758868 | -0.779886 |
| 1             | -3.808385               | -2.293878 | -0.626622 |
| 8             | -1.921465               | 2.444801  | -0.682041 |
| 1             | -2.727147               | 2.009498  | -0.341292 |
| 1             | -1.367935               | 1.695718  | -1.000063 |
| 8             | -0.206923               | 2.388115  | 1.558760  |
| 1             | -0.831780               | 2.629081  | 0.847213  |
| 1             | -0.023646               | 1.435372  | 1.372583  |

E(RB3LYP-D3) = -920.9922177 (Hartree)

Sum of electronic and thermal free energies = -920.719669 (Hartree)



## BAC2\_6H2O\_R Cartesian Coordinates

| Atomic Number | Coordinates (Angstroms) |           |           |
|---------------|-------------------------|-----------|-----------|
|               | X                       | Y         | Z         |
| 8             | 1.535028                | 1.848652  | -0.476692 |
| 6             | 2.079296                | -0.020833 | 0.850648  |
| 6             | 3.323428                | 0.896144  | 0.770804  |
| 1             | 1.611050                | -0.249446 | 1.808459  |
| 1             | 3.859146                | 1.055799  | 1.705889  |
| 6             | 4.000513                | -0.132339 | -0.183034 |
| 1             | 3.889611                | 0.193321  | -1.224119 |
| 6             | 5.441830                | -0.512885 | 0.097537  |
| 1             | 5.567126                | -0.823747 | 1.139892  |
| 1             | 5.761357                | -1.342699 | -0.541240 |
| 1             | 6.117758                | 0.328988  | -0.085160 |
| 6             | 2.820634                | 2.192226  | 0.153989  |
| 1             | 3.457698                | 2.591573  | -0.634109 |
| 1             | 2.607223                | 2.967247  | 0.890706  |
| 6             | 1.085879                | 0.660812  | -0.045250 |
| 8             | -0.008081               | 0.244951  | -0.395987 |
| 6             | 2.275034                | -1.980231 | -0.959154 |
| 1             | 3.017102                | -2.668040 | -1.376868 |
| 1             | 1.425731                | -2.574452 | -0.610709 |
| 1             | 1.925490                | -1.336965 | -1.772098 |
| 6             | 2.893774                | -1.171723 | 0.166245  |
| 1             | 3.247523                | -1.837918 | 0.958397  |
| 8             | -4.389700               | 0.291061  | 0.945296  |
| 1             | -5.315656               | 0.326871  | 1.212345  |
| 8             | -1.002873               | -2.177934 | 0.738722  |
| 1             | -1.690911               | -1.851345 | 1.364460  |
| 1             | -0.577418               | -1.382500 | 0.371506  |
| 8             | -3.350748               | 2.650286  | 0.536637  |
| 1             | -2.747276               | 2.846032  | 1.263205  |
| 1             | -3.774212               | 1.751408  | 0.741820  |
| 8             | -3.925580               | -0.222591 | -1.615797 |
| 1             | -3.237613               | 0.444002  | -1.810030 |
| 1             | -4.165354               | -0.062512 | -0.654711 |
| 8             | -1.970788               | 1.838766  | -1.707024 |
| 1             | -2.424587               | 2.217348  | -0.919566 |
| 1             | -1.220917               | 1.330189  | -1.348972 |
| 8             | -2.963656               | -1.282006 | 2.434486  |
| 1             | -2.578152               | -0.743843 | 3.136082  |
| 1             | -3.544869               | -0.659197 | 1.876554  |
| 8             | -2.623308               | -2.658948 | -1.498563 |
| 1             | -2.037183               | -2.564809 | -0.719477 |
| 1             | -3.097342               | -1.800231 | -1.571601 |

E(RB3LYP-D3) = -997.4824589 (Hartree)

Sum of electronic and thermal free energies = -997.194676 (Hartree)

## BAC2\_6H2O\_TS1 Cartesian Coordinates

| Atomic Number | Coordinates (Angstroms) |           |           |
|---------------|-------------------------|-----------|-----------|
|               | X                       | Y         | Z         |
| 8             | -1.063507               | -1.151443 | -1.372612 |
| 6             | -1.531182               | 0.012674  | 0.642155  |
| 6             | -2.585156               | -1.114735 | 0.440160  |
| 1             | -1.033409               | 0.102477  | 1.603945  |
| 1             | -2.869891               | -1.687626 | 1.323691  |
| 6             | -3.631137               | -0.053425 | -0.008984 |
| 1             | -3.776092               | -0.091890 | -1.095148 |
| 6             | -4.977182               | -0.066543 | 0.694364  |
| 1             | -4.849469               | -0.051670 | 1.782066  |
| 1             | -5.577217               | 0.806733  | 0.416679  |
| 1             | -5.553180               | -0.962372 | 0.438155  |
| 6             | -2.014582               | -1.990063 | -0.670957 |
| 1             | -2.759494               | -2.312429 | -1.399928 |
| 1             | -1.494494               | -2.872709 | -0.284949 |
| 6             | -0.507540               | -0.229355 | -0.467650 |
| 8             | 0.202597                | 0.677500  | -0.982927 |
| 6             | -2.433600               | 2.202802  | -0.636436 |
| 1             | -3.356679               | 2.784209  | -0.737866 |
| 1             | -1.639070               | 2.888852  | -0.328475 |
| 1             | -2.175069               | 1.813634  | -1.624151 |
| 6             | -2.639663               | 1.083914  | 0.371457  |
| 1             | -2.926807               | 1.516913  | 1.335690  |
| 8             | 0.673458                | -1.281083 | 0.421041  |
| 1             | 0.213511                | -2.028335 | 0.827096  |
| 8             | 1.315909                | 2.396589  | 0.851528  |
| 1             | 1.539546                | 1.729707  | 1.531874  |
| 1             | 0.820869                | 1.877809  | 0.176805  |
| 8             | 2.536717                | 0.176110  | -2.337342 |
| 1             | 2.846654                | -0.636951 | -1.890947 |
| 1             | 1.645562                | 0.334637  | -1.949731 |
| 8             | 2.978856                | -2.007173 | -0.676752 |
| 1             | 2.972284                | -2.924165 | -0.975219 |
| 1             | 2.073084                | -1.810132 | -0.299383 |
| 8             | 4.298246                | -1.016417 | 1.597964  |
| 1             | 3.512440                | -0.581061 | 1.983729  |
| 1             | 3.966972                | -1.434345 | 0.779040  |
| 8             | 1.843579                | 0.117432  | 2.352244  |
| 1             | 1.419594                | -0.053366 | 3.201527  |
| 1             | 1.352676                | -0.422522 | 1.664638  |
| 8             | 3.632714                | 2.223295  | -0.750277 |
| 1             | 3.340048                | 1.502871  | -1.346946 |
| 1             | 2.879337                | 2.361643  | -0.139765 |

E(RB3LYP-D3) = -997.4655154 (Hartree)

Sum of electronic and thermal free energies = -997.170471 (Hartree)

## BAC2\_6H2O\_Int Cartesian Coordinates

| Atomic Number | Coordinates (Angstroms) |           |           |
|---------------|-------------------------|-----------|-----------|
|               | X                       | Y         | Z         |
| 8             | 0.235580                | -0.818396 | -0.454144 |
| 6             | 1.662083                | 1.082583  | -0.588727 |
| 6             | 2.333150                | -0.139155 | -1.291091 |
| 1             | 1.691540                | 2.039176  | -1.110559 |
| 1             | 2.858778                | 0.055579  | -2.227614 |
| 6             | 3.258301                | -0.342379 | -0.059436 |
| 1             | 2.946341                | -1.221827 | 0.516758  |
| 6             | 4.753819                | -0.398965 | -0.320074 |
| 1             | 5.079492                | 0.460979  | -0.915339 |
| 1             | 5.319762                | -0.388578 | 0.617807  |
| 1             | 5.030992                | -1.306989 | -0.866750 |
| 6             | 1.222409                | -1.171116 | -1.445414 |
| 1             | 1.546169                | -2.193889 | -1.242203 |
| 1             | 0.765349                | -1.142557 | -2.442059 |
| 6             | 0.186650                | 0.685055  | -0.351019 |
| 8             | -0.428121               | 1.061666  | 0.731827  |
| 6             | 2.280645                | 0.877271  | 2.039111  |
| 1             | 3.166062                | 0.687230  | 2.656956  |
| 1             | 1.820851                | 1.804383  | 2.392821  |
| 1             | 1.571541                | 0.065793  | 2.212115  |
| 6             | 2.697698                | 0.960575  | 0.578482  |
| 1             | 3.428186                | 1.769240  | 0.464782  |
| 8             | -0.605223               | 1.118161  | -1.517408 |
| 1             | -0.139708               | 0.938718  | -2.346290 |
| 8             | -2.012828               | -2.181782 | -1.242523 |
| 1             | -1.244885               | -1.660446 | -0.912218 |
| 1             | -2.196315               | -1.839288 | -2.126468 |
| 8             | -3.977412               | -1.104902 | 0.275030  |
| 1             | -3.342803               | -1.636578 | -0.262310 |
| 1             | -4.804580               | -1.598286 | 0.324462  |
| 8             | -3.409756               | 1.092908  | -1.406086 |
| 1             | -3.710084               | 0.368939  | -0.823828 |
| 1             | -2.438768               | 0.992027  | -1.480628 |
| 8             | -2.077585               | -0.457385 | 2.230708  |
| 1             | -2.828758               | -0.714884 | 1.663279  |
| 1             | -1.490746               | 0.094034  | 1.652257  |
| 8             | -0.034994               | -2.338086 | 1.892046  |
| 1             | -0.815820               | -1.817835 | 2.172923  |
| 1             | 0.255520                | -1.868488 | 1.086800  |
| 8             | -2.458064               | 2.883635  | 0.617320  |
| 1             | -3.016727               | 2.456776  | -0.056546 |
| 1             | -1.672704               | 2.287004  | 0.666709  |

E(RB3LYP-D3) = -997.4690015 (Hartree)

Sum of electronic and thermal free energies = -997.173154 (Hartree)

## BAC2\_6H2O\_TS2 Cartesian Coordinates

| Atomic Number | Coordinates (Angstroms) |           |           |
|---------------|-------------------------|-----------|-----------|
|               | X                       | Y         | Z         |
| 8             | 0.266653                | -1.155241 | -0.173895 |
| 6             | 1.632867                | 0.860819  | -0.948235 |
| 6             | 2.313226                | -0.525777 | -1.182520 |
| 1             | 1.691628                | 1.556598  | -1.788716 |
| 1             | 2.889306                | -0.600522 | -2.108350 |
| 6             | 3.195066                | -0.299926 | 0.076035  |
| 1             | 2.813818                | -0.898428 | 0.911624  |
| 6             | 4.693184                | -0.503778 | -0.067987 |
| 1             | 5.088018                | 0.077479  | -0.908403 |
| 1             | 5.226378                | -0.188375 | 0.835581  |
| 1             | 4.937745                | -1.556613 | -0.247018 |
| 6             | 1.263140                | -1.623930 | -1.056202 |
| 1             | 1.716385                | -2.549347 | -0.673436 |
| 1             | 0.828339                | -1.861888 | -2.042425 |
| 6             | 0.151182                | 0.723224  | -0.609231 |
| 8             | -0.401527               | 1.305197  | 0.347776  |
| 6             | 2.276574                | 1.650483  | 1.565743  |
| 1             | 3.170748                | 1.705148  | 2.197321  |
| 1             | 1.827353                | 2.647344  | 1.538613  |
| 1             | 1.566934                | 0.976011  | 2.047542  |
| 6             | 2.673256                | 1.159034  | 0.181753  |
| 1             | 3.419188                | 1.844330  | -0.235870 |
| 8             | -0.664000               | 0.615816  | -1.750019 |
| 1             | -0.208923               | 0.149454  | -2.465606 |
| 8             | -1.942856               | -2.424913 | -0.804670 |
| 1             | -1.111079               | -1.917459 | -0.547824 |
| 1             | -2.169070               | -2.121896 | -1.692787 |
| 8             | -3.821625               | -1.184945 | 0.665701  |
| 1             | -3.181499               | -1.770811 | 0.188501  |
| 1             | -4.580849               | -1.722411 | 0.920147  |
| 8             | -3.513210               | 0.605558  | -1.481662 |
| 1             | -3.760902               | 0.027914  | -0.733885 |
| 1             | -2.551869               | 0.486967  | -1.595388 |
| 8             | -2.056395               | 0.210819  | 2.295867  |
| 1             | -2.744112               | -0.295320 | 1.818064  |
| 1             | -1.512425               | 0.624775  | 1.595450  |
| 8             | 0.130258                | -1.587598 | 2.482581  |
| 1             | -0.657205               | -1.028752 | 2.627768  |
| 1             | 0.314905                | -1.466422 | 1.517096  |
| 8             | -2.650724               | 2.930018  | -0.127489 |
| 1             | -3.164990               | 2.256612  | -0.612647 |
| 1             | -1.811386               | 2.467035  | 0.065001  |

E(RB3LYP-D3) = -997.4637394 (Hartree)

Sum of electronic and thermal free energies = -997.170127 (Hartree)

## BAL2\_6H2O\_TS Cartesian Coordinates

| Atomic Number | Coordinates (Angstroms) |           |           |
|---------------|-------------------------|-----------|-----------|
|               | X                       | Y         | Z         |
| 8             | -0.395716               | 1.266140  | -0.557900 |
| 6             | -1.756351               | 0.111004  | 0.975063  |
| 6             | -1.026134               | -1.055200 | 0.255277  |
| 1             | -1.681211               | 0.171715  | 2.061709  |
| 1             | -0.745855               | -1.852846 | 0.941236  |
| 6             | -2.321959               | -1.366833 | -0.540356 |
| 1             | -2.264959               | -0.905795 | -1.533195 |
| 6             | -2.747773               | -2.818318 | -0.658847 |
| 1             | -2.792200               | -3.293361 | 0.326748  |
| 1             | -3.737802               | -2.905699 | -1.118581 |
| 1             | -2.042495               | -3.388626 | -1.273132 |
| 6             | 0.166780                | -0.587335 | -0.517424 |
| 1             | 0.183367                | -0.600394 | -1.592476 |
| 1             | 1.074511                | -0.320489 | -0.004743 |
| 6             | -1.281825               | 1.410018  | 0.363270  |
| 8             | -1.713632               | 2.522312  | 0.735399  |
| 6             | -4.130913               | 0.519135  | -0.182131 |
| 1             | -4.964793               | -0.039987 | -0.619075 |
| 1             | -4.542496               | 1.201219  | 0.567966  |
| 1             | -3.684935               | 1.124175  | -0.977557 |
| 6             | -3.118611               | -0.437702 | 0.421636  |
| 1             | -3.590793               | -1.034468 | 1.208096  |
| 8             | 1.122351                | -2.488892 | -0.738427 |
| 1             | 0.426484                | -3.015723 | -1.150569 |
| 8             | 1.725290                | -2.664591 | 1.785153  |
| 1             | 2.168135                | -3.502477 | 1.964456  |
| 1             | 1.434072                | -2.691576 | 0.816634  |
| 8             | 3.181545                | -1.020993 | -1.640996 |
| 1             | 2.837647                | -0.112285 | -1.743114 |
| 1             | 2.401871                | -1.604101 | -1.443380 |
| 8             | 3.630702                | -0.760000 | 1.115299  |
| 1             | 3.606012                | -0.868529 | 0.139568  |
| 1             | 2.988809                | -1.420892 | 1.457658  |
| 8             | 2.480418                | 1.717136  | 1.159224  |
| 1             | 1.530624                | 1.621987  | 1.307052  |
| 1             | 2.867373                | 0.811171  | 1.233421  |
| 8             | 2.319126                | 1.734721  | -1.622053 |
| 1             | 2.457586                | 1.804067  | -0.651566 |
| 1             | 1.355990                | 1.704488  | -1.713708 |
| 8             | 0.331521                | 4.319468  | -0.064888 |
| 1             | -0.417398               | 3.743339  | 0.193164  |
| 1             | 0.980323                | 3.724070  | -0.462033 |

E(RB3LYP-D3) = -997.4476247 (Hartree)

Sum of electronic and thermal free energies = -997.155440 (Hartree)

## AAC2\_6H2O\_R Cartesian Coordinates

| Atomic Number | Coordinates (Angstroms) |           |           |
|---------------|-------------------------|-----------|-----------|
|               | X                       | Y         | Z         |
| 8             | -1.594800               | 1.581003  | -0.166197 |
| 6             | -1.725016               | -0.684986 | -0.785761 |
| 6             | -3.102267               | -0.028810 | -1.051060 |
| 1             | -1.150972               | -1.136651 | -1.594405 |
| 1             | -3.582759               | -0.291713 | -1.992006 |
| 6             | -3.678818               | -0.774161 | 0.189137  |
| 1             | -3.698670               | -0.100129 | 1.053128  |
| 6             | -5.016783               | -1.473428 | 0.034815  |
| 1             | -5.008526               | -2.135388 | -0.837127 |
| 1             | -5.245829               | -2.078469 | 0.917854  |
| 1             | -5.827373               | -0.749548 | -0.097108 |
| 6             | -2.863517               | 1.466264  | -0.913407 |
| 1             | -3.617404               | 1.990139  | -0.327829 |
| 1             | -2.704775               | 1.970356  | -1.866954 |
| 6             | -0.927927               | 0.422092  | -0.164096 |
| 8             | 0.194840                | 0.351280  | 0.318865  |
| 6             | -1.751119               | -1.922291 | 1.588994  |
| 1             | -2.418822               | -2.528925 | 2.208596  |
| 1             | -0.806366               | -2.463394 | 1.483860  |
| 1             | -1.552453               | -0.989734 | 2.125343  |
| 6             | -2.398994               | -1.660546 | 0.241291  |
| 1             | -2.581813               | -2.604275 | -0.279414 |
| 1             | 4.178346                | -0.145053 | 0.472938  |
| 8             | 4.130944                | -1.172612 | 0.486432  |
| 1             | 4.687340                | -1.533695 | -0.276991 |
| 1             | 3.158979                | -1.469758 | 0.353705  |
| 8             | 1.845590                | 2.429439  | 1.114393  |
| 1             | 1.742115                | 2.623702  | 2.054917  |
| 1             | 1.208356                | 1.709098  | 0.922021  |
| 8             | 0.078184                | 4.004473  | -0.513751 |
| 1             | 0.789380                | 3.637309  | 0.041695  |
| 1             | -0.592024               | 3.305008  | -0.487788 |
| 8             | 1.712678                | -1.939219 | 0.130410  |
| 1             | 1.106514                | -1.171179 | 0.218893  |
| 1             | 1.435245                | -2.567563 | 0.809784  |
| 8             | 4.289619                | 1.375751  | 0.500550  |
| 1             | 4.514249                | 1.710864  | -0.377310 |
| 1             | 3.416241                | 1.780070  | 0.723688  |
| 8             | 5.588274                | -2.073871 | -1.478490 |
| 1             | 6.301435                | -2.640040 | -1.152970 |
| 1             | 5.073595                | -2.635785 | -2.073690 |

E(RB3LYP-D3) = -922.0029399 (Hartree)

Sum of electronic and thermal free energies = -921.715427 (Hartree)

## AAC2\_6H2O\_TS1 Cartesian Coordinates

| Atomic Number | Coordinates (Angstroms) |           |           |
|---------------|-------------------------|-----------|-----------|
|               | X                       | Y         | Z         |
| 8             | 0.487582                | 0.409236  | -1.195071 |
| 6             | 1.594379                | -0.010241 | 0.844804  |
| 6             | 2.117190                | 1.336004  | 0.252637  |
| 1             | 1.291154                | -0.049147 | 1.887355  |
| 1             | 2.256956                | 2.154956  | 0.956719  |
| 6             | 3.425945                | 0.626434  | -0.199955 |
| 1             | 3.432634                | 0.486458  | -1.286295 |
| 6             | 4.736271                | 1.245767  | 0.255558  |
| 1             | 4.730475                | 1.412170  | 1.337804  |
| 1             | 5.581170                | 0.590921  | 0.018825  |
| 1             | 4.909086                | 2.210002  | -0.233489 |
| 6             | 1.136906                | 1.684337  | -0.860411 |
| 1             | 1.606457                | 2.041090  | -1.775825 |
| 1             | 0.359946                | 2.381116  | -0.541048 |
| 6             | 0.431608                | -0.337982 | -0.062333 |
| 8             | 0.073729                | -1.597630 | -0.226005 |
| 6             | 3.061343                | -1.976162 | -0.266630 |
| 1             | 4.112691                | -2.208467 | -0.464969 |
| 1             | 2.627705                | -2.815849 | 0.283452  |
| 1             | 2.547271                | -1.897918 | -1.227691 |
| 6             | 2.973462                | -0.678079 | 0.519986  |
| 1             | 3.512067                | -0.788573 | 1.465352  |
| 1             | -0.659920               | -1.703678 | -0.911467 |
| 8             | -0.865253               | 0.410266  | 0.788104  |
| 1             | -1.261329               | -0.280948 | 1.384664  |
| 1             | -1.602179               | 0.668624  | 0.128046  |
| 8             | -2.826627               | 1.019559  | -0.782759 |
| 1             | -3.403761               | 0.260489  | -0.567932 |
| 1             | -3.268112               | 1.814314  | -0.412585 |
| 8             | -1.916760               | -1.979432 | -1.884884 |
| 1             | -2.687211               | -1.889426 | -1.282282 |
| 1             | -1.916197               | -2.902603 | -2.168807 |
| 8             | -3.838696               | -1.443566 | 0.021666  |
| 1             | -3.359808               | -1.559614 | 0.866729  |
| 1             | -4.708312               | -1.844962 | 0.137665  |
| 8             | -2.066910               | -1.539804 | 2.196756  |
| 1             | -1.510133               | -2.330716 | 2.197313  |
| 1             | -2.313764               | -1.391666 | 3.119586  |
| 8             | -4.006880               | 3.303394  | 0.274914  |
| 1             | -3.474431               | 3.623789  | 1.014788  |
| 1             | -3.986567               | 4.022967  | -0.369624 |

E(RB3LYP-D3) = -921.9720337 (Hartree)

Sum of electronic and thermal free energies = -921.680945 (Hartree)

## AAC2\_6H2O\_Int Cartesian Coordinates

| Atomic Number | Coordinates (Angstroms) |           |           |
|---------------|-------------------------|-----------|-----------|
|               | X                       | Y         | Z         |
| 8             | -0.055255               | 0.200157  | -0.008777 |
| 6             | 1.828687                | -1.034260 | 0.691167  |
| 6             | 1.898415                | 0.419366  | 1.269162  |
| 1             | 2.051304                | -1.855044 | 1.369818  |
| 1             | 2.251544                | 0.518679  | 2.295341  |
| 6             | 2.939496                | 0.801816  | 0.179993  |
| 1             | 2.479593                | 1.440622  | -0.582353 |
| 6             | 4.243990                | 1.418012  | 0.657396  |
| 1             | 4.701675                | 0.799996  | 1.437034  |
| 1             | 4.960354                | 1.506777  | -0.166077 |
| 1             | 4.082264                | 2.418595  | 1.072200  |
| 6             | 0.505098                | 1.000290  | 1.070620  |
| 1             | 0.499751                | 2.038693  | 0.736315  |
| 1             | -0.124995               | 0.894312  | 1.957280  |
| 6             | 0.384118                | -1.168410 | 0.209434  |
| 8             | 0.217608                | -1.869648 | -0.970675 |
| 6             | 2.890130                | -0.918041 | -1.798481 |
| 1             | 3.782182                | -0.508226 | -2.284690 |
| 1             | 2.833800                | -1.982700 | -2.040780 |
| 1             | 2.015294                | -0.426707 | -2.228771 |
| 6             | 2.985565                | -0.677717 | -0.299298 |
| 1             | 3.894405                | -1.156255 | 0.078856  |
| 1             | -0.740681               | -1.880704 | -1.213441 |
| 8             | -0.357786               | -1.720304 | 1.271419  |
| 1             | -1.428526               | 0.675603  | -0.542828 |
| 1             | -1.319387               | -1.631160 | 1.096170  |
| 8             | -3.136448               | -1.581699 | 0.989787  |
| 1             | -3.542162               | -0.704003 | 1.131505  |
| 1             | -3.665762               | -2.213176 | 1.492366  |
| 8             | -2.441493               | -1.865597 | -1.671292 |
| 1             | -2.805043               | -1.805160 | -0.762490 |
| 1             | -2.579563               | -0.983759 | -2.040988 |
| 8             | -2.242729               | 1.174294  | -0.901412 |
| 1             | -1.939565               | 2.138992  | -1.046386 |
| 1             | -2.953441               | 1.167982  | -0.185762 |
| 8             | -1.347106               | 3.560344  | -1.252938 |
| 1             | -0.627938               | 3.677524  | -0.616043 |
| 1             | -1.992206               | 4.247795  | -1.037204 |
| 8             | -4.025727               | 1.062871  | 1.005575  |
| 1             | -3.831185               | 1.649114  | 1.749810  |
| 1             | -4.943217               | 1.242531  | 0.757669  |

E(RB3LYP-D3) = -921.9798128 (Hartree)

Sum of electronic and thermal free energies = -921.682365 (Hartree)



## AAC2\_6H2O\_TS2 Cartesian Coordinates

| Atomic Number | Coordinates (Angstroms) |           |           |
|---------------|-------------------------|-----------|-----------|
|               | X                       | Y         | Z         |
| 8             | -0.190561               | 0.425703  | -0.436569 |
| 6             | 1.638533                | -0.335479 | 0.976883  |
| 6             | 1.747144                | 1.185804  | 0.645308  |
| 1             | 1.634926                | -0.617668 | 2.027340  |
| 1             | 2.104717                | 1.801054  | 1.470582  |
| 6             | 2.845685                | 0.864752  | -0.404362 |
| 1             | 2.383789                | 0.763607  | -1.393384 |
| 6             | 4.060761                | 1.770886  | -0.478265 |
| 1             | 4.517912                | 1.884010  | 0.510295  |
| 1             | 4.816174                | 1.360020  | -1.155816 |
| 1             | 3.791087                | 2.767687  | -0.842574 |
| 6             | 0.406183                | 1.645234  | 0.133981  |
| 1             | 0.461124                | 2.373789  | -0.674639 |
| 1             | -0.250730               | 2.006742  | 0.925788  |
| 6             | 0.319398                | -0.824171 | 0.372634  |
| 8             | 0.429957                | -1.830069 | -0.525639 |
| 6             | 3.341315                | -1.725563 | -0.650761 |
| 1             | 4.380524                | -1.637509 | -0.984695 |
| 1             | 3.243427                | -2.673456 | -0.113303 |
| 1             | 2.704262                | -1.768642 | -1.534347 |
| 6             | 3.002257                | -0.538919 | 0.237281  |
| 1             | 3.759032                | -0.467187 | 1.026166  |
| 1             | -0.445673               | -2.115144 | -0.905082 |
| 8             | -0.600149               | -1.042502 | 1.385155  |
| 1             | -1.309108               | 0.539853  | -0.418100 |
| 1             | -1.447869               | -1.408739 | 1.038323  |
| 8             | -3.133262               | -1.838422 | 0.577064  |
| 1             | -3.403866               | -0.948399 | 0.296390  |
| 1             | -3.800990               | -2.150202 | 1.200523  |
| 8             | -1.820333               | -2.771479 | -1.638973 |
| 1             | -2.456400               | -2.562107 | -0.924790 |
| 1             | -2.092706               | -2.225701 | -2.387702 |
| 8             | -2.589078               | 0.785437  | -0.271530 |
| 1             | -2.864340               | 1.542750  | -0.850565 |
| 1             | -2.638670               | 1.088473  | 0.667095  |
| 8             | -3.240910               | 2.807149  | -1.929373 |
| 1             | -2.585069               | 3.512595  | -1.848883 |
| 1             | -4.085939               | 3.230995  | -1.728382 |
| 8             | -2.258903               | 1.097584  | 2.418624  |
| 1             | -1.531694               | 0.463630  | 2.283828  |
| 1             | -1.825664               | 1.917072  | 2.689666  |

E(RB3LYP-D3) = -921.9696672 (Hartree)

Sum of electronic and thermal free energies = -921.676877 (Hartree)

## AAC2\_6H2O\_TSuni Cartesian Coordinates

| Atomic Number | Coordinates (Angstroms) |           |           |
|---------------|-------------------------|-----------|-----------|
|               | X                       | Y         | Z         |
| 8             | -0.321675               | -0.358036 | -1.282174 |
| 6             | 1.099354                | 1.160492  | 0.235789  |
| 6             | 1.753384                | 0.827331  | -1.133922 |
| 1             | 1.028605                | 2.210312  | 0.518360  |
| 1             | 2.281067                | 1.670920  | -1.578723 |
| 6             | 2.697390                | -0.188247 | -0.426882 |
| 1             | 2.334429                | -1.208658 | -0.586362 |
| 6             | 4.180047                | -0.101650 | -0.740225 |
| 1             | 4.548310                | 0.918578  | -0.591425 |
| 1             | 4.756736                | -0.768709 | -0.091606 |
| 1             | 4.380063                | -0.385936 | -1.778330 |
| 6             | 0.715239                | 0.254973  | -2.088341 |
| 1             | 1.141155                | -0.501310 | -2.750221 |
| 1             | 0.226899                | 1.029534  | -2.676893 |
| 6             | -0.275275               | 0.602714  | 0.331094  |
| 8             | -0.970892               | 0.119916  | 1.139387  |
| 6             | 1.870017                | -0.693333 | 2.022934  |
| 1             | 2.783053                | -1.193232 | 2.360156  |
| 1             | 1.398072                | -0.228346 | 2.893126  |
| 1             | 1.195445                | -1.457583 | 1.633163  |
| 6             | 2.219064                | 0.330806  | 0.958081  |
| 1             | 2.934175                | 1.055692  | 1.356209  |
| 1             | -0.092405               | -1.312926 | -1.050147 |
| 8             | -1.225436               | 1.979299  | -0.603275 |
| 1             | -1.329807               | 2.650259  | 0.117233  |
| 1             | -2.126958               | 1.584465  | -0.764593 |
| 8             | -3.633021               | 0.872014  | -1.014598 |
| 1             | -3.513947               | -0.087404 | -0.834992 |
| 1             | -3.886482               | 0.927728  | -1.944530 |
| 8             | -1.060124               | -2.845740 | 1.854803  |
| 1             | -1.095924               | -1.880193 | 1.915717  |
| 1             | -1.982120               | -3.115702 | 1.749995  |
| 8             | -3.222855               | -1.812617 | -0.446585 |
| 1             | -2.272127               | -1.887821 | -0.286847 |
| 1             | -3.625880               | -2.027189 | 0.404858  |
| 8             | -1.243915               | 3.679557  | 1.521361  |
| 1             | -1.293812               | 3.070576  | 2.270969  |
| 1             | -0.335394               | 4.009892  | 1.539032  |
| 8             | 0.136367                | -2.867225 | -0.645254 |
| 1             | -0.417393               | -3.414937 | -1.217053 |
| 1             | -0.258684               | -2.953856 | 0.252408  |

E(RB3LYP-D3) = -921.9562319 (Hartree)

Sum of electronic and thermal free energies = -921.665646 (Hartree)

## AAL2\_6H2O\_TS Cartesian Coordinates

| Atomic Number | Coordinates (Angstroms) |           |           |
|---------------|-------------------------|-----------|-----------|
|               | X                       | Y         | Z         |
| 8             | -1.303993               | -0.259643 | -0.547327 |
| 6             | 0.126253                | -1.399164 | 0.931224  |
| 6             | 1.156384                | -0.473805 | 0.215368  |
| 1             | 0.068782                | -1.355527 | 2.018148  |
| 1             | 1.865195                | -0.058267 | 0.930212  |
| 6             | 1.705610                | -1.695112 | -0.570070 |
| 1             | 1.293273                | -1.699298 | -1.584275 |
| 6             | 3.211044                | -1.886275 | -0.605578 |
| 1             | 3.623874                | -1.884713 | 0.408974  |
| 1             | 3.471278                | -2.841365 | -1.072128 |
| 1             | 3.696820                | -1.087996 | -1.175150 |
| 6             | 0.505223                | 0.626265  | -0.553612 |
| 1             | 0.481398                | 0.623853  | -1.630456 |
| 1             | 0.067015                | 1.465580  | -0.036152 |
| 6             | -1.216757               | -1.122443 | 0.349795  |
| 8             | -2.238285               | -1.783686 | 0.803357  |
| 6             | 0.078436                | -3.754385 | -0.323414 |
| 1             | 0.758978                | -4.480197 | -0.778579 |
| 1             | -0.550356               | -4.285058 | 0.396939  |
| 1             | -0.566133               | -3.358670 | -1.114500 |
| 6             | 0.879239                | -2.649537 | 0.341871  |
| 1             | 1.511569                | -3.061689 | 1.131531  |
| 1             | -3.121578               | -1.451499 | 0.407277  |
| 8             | 2.209692                | 1.878729  | -0.852836 |
| 1             | 1.794782                | 2.741457  | -0.616705 |
| 1             | 2.887129                | 1.699189  | -0.163424 |
| 8             | 0.820374                | 4.152567  | -0.192324 |
| 1             | -0.044320               | 3.837692  | 0.153427  |
| 1             | 0.604612                | 4.674021  | -0.975411 |
| 8             | -1.555297               | 3.243489  | 0.925222  |
| 1             | -2.050230               | 3.980265  | 1.304988  |
| 1             | -2.201966               | 2.760021  | 0.372569  |
| 8             | -3.323380               | 1.644392  | -0.629553 |
| 1             | -3.531487               | 2.038270  | -1.486801 |
| 1             | -2.601264               | 1.010604  | -0.801107 |
| 8             | -4.494819               | -0.882109 | -0.093060 |
| 1             | -5.147526               | -0.903206 | 0.619681  |
| 1             | -4.319565               | 0.065939  | -0.261319 |
| 8             | 4.141597                | 1.225738  | 1.027837  |
| 1             | 4.992659                | 1.652297  | 0.862455  |
| 1             | 4.297345                | 0.289219  | 0.845777  |

E(RB3LYP-D3) = -921.9620073 (Hartree)

Sum of electronic and thermal free energies = -921.672335 (Hartree)

## AAL1\_6H2O\_TS1 Cartesian Coordinates

| Atomic Number | Coordinates (Angstroms) |           |           |
|---------------|-------------------------|-----------|-----------|
|               | X                       | Y         | Z         |
| 8             | -0.010807               | 0.259072  | 0.910668  |
| 6             | -1.587090               | -0.187497 | -0.851322 |
| 6             | -2.597792               | 0.546679  | 0.025910  |
| 1             | -1.511666               | 0.112136  | -1.893832 |
| 1             | -3.275309               | 1.289686  | -0.564276 |
| 6             | -3.325427               | -0.749696 | 0.429573  |
| 1             | -3.049432               | -1.002211 | 1.456931  |
| 6             | -4.828410               | -0.822257 | 0.236658  |
| 1             | -5.102927               | -0.543901 | -0.784879 |
| 1             | -5.181745               | -1.839738 | 0.423997  |
| 1             | -5.343263               | -0.149601 | 0.928393  |
| 6             | -2.330962               | 1.678791  | 0.786352  |
| 1             | -2.970462               | 1.944060  | 1.626330  |
| 1             | -1.567889               | 2.385295  | 0.470024  |
| 6             | -0.214002               | -0.183288 | -0.220831 |
| 8             | 0.704265                | -0.723035 | -0.984299 |
| 6             | -1.698499               | -2.743577 | -0.096011 |
| 1             | -2.427005               | -3.521349 | 0.149395  |
| 1             | -1.019010               | -3.140112 | -0.854661 |
| 1             | -1.119208               | -2.529157 | 0.807331  |
| 6             | -2.422580               | -1.507814 | -0.598213 |
| 1             | -2.989007               | -1.733219 | -1.503634 |
| 1             | 1.627618                | -0.740256 | -0.546528 |
| 8             | 3.091671                | -0.743444 | -0.001880 |
| 1             | 3.601554                | -1.567477 | -0.169807 |
| 1             | 3.004690                | -0.639447 | 0.969382  |
| 8             | 1.120830                | 2.881651  | 0.635221  |
| 1             | 1.005658                | 3.584022  | 1.287274  |
| 1             | 0.740459                | 2.081510  | 1.031480  |
| 8             | 4.473282                | -3.070417 | -0.539302 |
| 1             | 4.949694                | -3.002223 | -1.377181 |
| 1             | 5.159238                | -3.239129 | 0.119965  |
| 8             | 3.429967                | 1.974594  | -0.768203 |
| 1             | 2.678529                | 2.347937  | -0.273468 |
| 1             | 3.397639                | 1.022590  | -0.562819 |
| 8             | 2.267077                | -0.085609 | 2.551577  |
| 1             | 2.603551                | 0.803846  | 2.719799  |
| 1             | 1.435941                | 0.054749  | 2.058850  |
| 8             | -0.187224               | 2.874841  | -1.873605 |
| 1             | 0.263476                | 2.895621  | -1.007353 |
| 1             | 0.004977                | 1.997090  | -2.224834 |

E(RB3LYP-D3) = -921.9359421 (Hartree)

Sum of electronic and thermal free energies = -921.656348 (Hartree)

## AAL1\_6H2O\_Int Cartesian Coordinates

| Atomic Number | Coordinates (Angstroms) |           |           |
|---------------|-------------------------|-----------|-----------|
|               | X                       | Y         | Z         |
| 8             | 0.079058                | 0.062423  | 1.064645  |
| 6             | -1.515372               | -0.273582 | -0.695868 |
| 6             | -2.580378               | 0.446836  | 0.054909  |
| 1             | -1.466363               | 0.120950  | -1.717552 |
| 1             | -3.199352               | 2.207421  | -0.682091 |
| 6             | -3.330760               | -0.761004 | 0.352476  |
| 1             | -2.921567               | -0.910566 | 1.386296  |
| 6             | -4.844281               | -0.843360 | 0.377203  |
| 1             | -5.235027               | -0.675054 | -0.628565 |
| 1             | -5.154296               | -1.833133 | 0.715380  |
| 1             | -5.264591               | -0.093500 | 1.050431  |
| 6             | -2.808637               | 1.844893  | 0.290639  |
| 1             | -3.573674               | 2.029115  | 1.044234  |
| 1             | -1.877460               | 2.392122  | 0.457108  |
| 6             | -0.126577               | -0.270443 | -0.097946 |
| 8             | 0.783133                | -0.690551 | -0.940591 |
| 6             | -1.751143               | -2.844983 | -0.013295 |
| 1             | -2.518420               | -3.604291 | 0.159042  |
| 1             | -1.016943               | -3.255263 | -0.711091 |
| 1             | -1.250498               | -2.643958 | 0.938373  |
| 6             | -2.384259               | -1.590693 | -0.579020 |
| 1             | -2.865708               | -1.783444 | -1.537980 |
| 1             | 1.726265                | -0.702219 | -0.537464 |
| 8             | 3.198454                | -0.655066 | -0.060727 |
| 1             | 3.723472                | -1.472194 | -0.216860 |
| 1             | 3.159018                | -0.506844 | 0.907814  |
| 8             | 0.778948                | 2.852377  | 0.629397  |
| 1             | 0.534290                | 3.628198  | 1.149105  |
| 1             | 0.430923                | 2.086661  | 1.110685  |
| 8             | 4.614260                | -2.970820 | -0.542054 |
| 1             | 5.089896                | -2.923010 | -1.381790 |
| 1             | 5.303238                | -3.102888 | 0.122490  |
| 8             | 3.282661                | 2.172937  | -0.580370 |
| 1             | 2.455853                | 2.421460  | -0.130104 |
| 1             | 3.323793                | 1.204991  | -0.496442 |
| 8             | 2.511813                | 0.195931  | 2.473664  |
| 1             | 2.779844                | 1.123642  | 2.450441  |
| 1             | 1.634990                | 0.184074  | 2.042888  |
| 8             | -0.037791               | 2.484410  | -2.070168 |
| 1             | 0.203927                | 2.624860  | -1.134928 |
| 1             | 0.342538                | 1.623768  | -2.284376 |

E(RB3LYP-D3) = -921.9630137 (Hartree)

Sum of electronic and thermal free energies = -921.687624 (Hartree)

## AAL1\_6H2O\_TS2 Cartesian Coordinates

| Atomic Number | Coordinates (Angstroms) |           |           |
|---------------|-------------------------|-----------|-----------|
|               | X                       | Y         | Z         |
| 8             | -0.517436               | 0.134639  | 0.432624  |
| 6             | 1.156912                | 0.942427  | -1.093631 |
| 6             | 1.946110                | -0.352685 | -0.934486 |
| 1             | 1.087828                | 1.323736  | -2.109919 |
| 1             | 2.550177                | -0.607721 | -2.001602 |
| 6             | 2.870440                | 0.234269  | 0.120005  |
| 1             | 2.505103                | -0.115101 | 1.091105  |
| 6             | 4.368410                | 0.016517  | 0.002386  |
| 1             | 4.730890                | 0.346823  | -0.975080 |
| 1             | 4.888869                | 0.586849  | 0.775664  |
| 1             | 4.620787                | -1.039581 | 0.128792  |
| 6             | 1.753662                | -1.631311 | -1.426622 |
| 1             | 2.477134                | -2.403961 | -1.199553 |
| 1             | 0.990550                | -1.818801 | -2.172091 |
| 6             | -0.207486               | 0.916533  | -0.466401 |
| 8             | -1.015549               | 1.836544  | -0.941585 |
| 6             | 1.841785                | 2.505767  | 0.969838  |
| 1             | 2.721174                | 2.813631  | 1.542318  |
| 1             | 1.328620                | 3.407680  | 0.625309  |
| 1             | 1.173794                | 1.963816  | 1.645356  |
| 6             | 2.270555                | 1.639956  | -0.198712 |
| 1             | 2.934217                | 2.191675  | -0.867284 |
| 1             | -1.919138               | 1.821041  | -0.486603 |
| 8             | -3.418438               | 1.779229  | 0.116103  |
| 1             | -3.818546               | 2.636557  | 0.310370  |
| 1             | -3.340216               | 1.300417  | 0.972013  |
| 8             | -2.245905               | -2.010179 | -0.382830 |
| 1             | -2.778299               | -2.327534 | 0.358916  |
| 1             | -1.784813               | -1.227548 | -0.034847 |
| 8             | 0.380851                | -3.204645 | -0.107933 |
| 1             | -0.529708               | -2.920659 | -0.308721 |
| 1             | 0.556171                | -2.801510 | 0.765546  |
| 8             | -4.010721               | -0.238813 | -1.831201 |
| 1             | -3.450431               | -0.925444 | -1.426658 |
| 1             | -3.912264               | 0.517152  | -1.226015 |
| 8             | -2.697489               | 0.219084  | 2.271052  |
| 1             | -3.081902               | -0.656037 | 2.128665  |
| 1             | -1.855543               | 0.191118  | 1.782067  |
| 8             | 0.715144                | -1.656625 | 2.236590  |
| 1             | 0.396204                | -0.937631 | 1.660679  |
| 1             | -0.016631               | -1.821681 | 2.844753  |

E(RB3LYP-D3) = -921.9463717 (Hartree)

Sum of electronic and thermal free energies = -921.662477 (Hartree)

## REFERENCES

- (1) Gómez-Bombarelli, R.; Calle, E.; Casado, J. Mechanisms of Lactone Hydrolysis in Neutral and Alkaline Conditions. *J. Org. Chem.* **2013**, 78, 6868-6879.
- (2) Gómez-Bombarelli, R.; Calle, E.; Casado, J. Mechanisms of Lactone Hydrolysis in Acidic Conditions. *J. Org. Chem.* **2013**, 78, 6880-6889.
